# Supplementary material
Source: HighWire-hosted journal article supplement (doi:10.1101/rna.080634.125)
Supplement: Supplemental_Material2.docx [file Supplemental_Material2.docx]

**Supplemental Materials, Section 2**

FIGURE S6.Analysis of integrity of synthesized Fluc TCP-mRNAs, containing various trinucleotide caps, by RP-HPLC or Fragment Analyzer (FA). TCP structure and method of analysis are indicated.

FIGURE S7 (A-H). Detection of dsRNA contaminants in TCP-mRNA samples.

FIGURE S8. Level of dsRNA contaminants in selected TCP-mRNAs.

FIGURE S9 (A-C). Capping assay analytical data for TCP-mRNAs synthesized on “d(TTCT)” DNA template using 7mGmppp6mAmpA, 7mGppp6mAmpA and 7mGmpppAmpA for IVT initiation.

FIGURE S10 (A, B).Examples of capping assay analytical data for TCP-mRNAs synthesized on “d(TCCT)” DNA template using 7mGpppAmpG (1-1A) or 7mGmpppAmpG (1-2A) for IVT initiation.

Table S3. Summary of analytical data for synthesized Fluc TCP-mRNAs

Table S4. Structures and analytical data for synthesized TCP-mRNAs (Fluc)

Study of competition between 7mGmpppAmpG and ppAmpG for initiation of TCP-RNA synthesis

Nucleotide sequences of RNAs used in this work

| Table S3. Summary of analytical data for synthesized Fluc TCP-mRNAs | | | | | | |
| --- | --- | --- | --- | --- | --- | --- |
| **TCP** | **Yield** | **Capped TCP-mRNA** | **dsRNA content** | **HPLC or FA FLP area** | **Quality assay** | **Purification method** |
|  | **μg/μL** | **%** | **ng/μg** | **%** |  |  |
| 1-1A | 10.0 | 98.0 | 6.6 | 93.8 | HPLC | Oligo-dT |
| 1-2A | 10.0 | 96.9 | 5.9 | 83.3 | HPLC | Oligo-dT |
| 1-3A | 10.8 | 97.0 | 2.0 | 82.1 | HPLC | Oligo-dT |
| 1-4A | 9.6 | 95.9 | <2 | 88.6 | HPLC | Oligo-dT |
| 1-5A | 8.3 | 97.6 | 2.8 | 76.6 | HPLC | Rneasy |
| 1-7A | 4.3 | 100.0 | <2 | 87.5 | FA | Oligo-dT |
| 1-8A | 4.3 | 100.0 | 2.9 | 85.6 | FA | Oligo-dT |
| 1-11A | 9.0 | 97.9 | 2.8 | 92.2 | HPLC | Oligo-dT |
| 1-12A | 9.3 | 98.0 | 3.9 | 77.5 | HPLC | Rneasy |
| 1-13A | 8.8 | 99.1 | <2 | 75.9 | HPLC | Rneasy |
| 1-1B | 4.3 | 98.4 | 3.2 | 97.0 | HPLC | Oligo-dT |
| 1-2B | 4.5 | 97.9 | <2 | 87.4 | HPLC | Oligo-dT |
| 1-3B | 4.5 | 98.5 | <2 | 94.7 | HPLC | Oligo-dT |
| 1-4B | 4.8 | 97.6 | <2 | 95.0 | HPLC | Oligo-dT |
| 1-5B | 4.8 | 99.0 | 2.2 | 82.6 | HPLC | Rneasy |
| 1-6B | 4.3 | 99.1 | <2 | 77.4 | HPLC | Rneasy |
| 1-7B | 3.6 | 98.4 | 6.8 | 71.4 | FA | Oligo-dT |
| 1-8B | 4.4 | 99.4 | 1.5 | 87.9 | FA | Oligo-dT |
| 1-9B | 4.8 | 97.7 | <2 | 95.0 | HPLC | Oligo-dT |
| 1-10B | 5.0 | 98.4 | <2 | 84.8 | HPLC | Oligo-dT |
| 1-12B | 4.3 | 99.0 | 3.9 | 79.5 | HPLC | Rneasy |
| 1-13B | 4.3 | 99.4 | 2.9 | 78.5 | HPLC | Rneasy |
| 1-14B | 4.3 | 99.5 | <2 | 80.1 | HPLC | Rneasy |
| 1-15B | 4.3 | 99.3 | 2.4 | 93.9 | HPLC | Oligo-dT |
| 2-2A | 5.9 | 95.7 | 3.0 | 80.2 | HPLC | Rneasy |
| 2-4A12 | 8.3 | 92.8 | <2 | 75.3 | HPLC | Rneasy |
| 2-5A1 | 8.6 | 95.5 | <2 | 75.7 | HPLC | Rneasy |
| 2-5A2 | 8.3 | 94.9 | <2 | 75.1 | HPLC | Rneasy |
| 2-7A | 8.1 | 98.3 | 2.8 | 77.5 | HPLC | Rneasy |
| 2-8A | 4.2 | 100.0 | <2 | 85.6 | FA | Oligo-dT |
| 2-10A | 10.7 | 96.8 | 3.5 | 91.6 | HPLC | Oligo-dT |
| 2-11A | 10.6 | 97.2 | <2 | 92.1 | HPLC | Oligo-dT |
| 2-2B | 3.0 | 98.7 | 2.6 | 82.4 | HPLC | Rneasy |
| 2-3B | 4.1 | 96.1 | <2 | 76.5 | HPLC | Rneasy |
| 2-4B12 | 3.7 | 93.9 | 3.7 | 79.4 | FA | Oligo-dT |
| 2-5B1 | 5.6 | 96.5 | 4.0 | 90.8 | HPLC | Oligo-dT |
| 3-1A | 9.7 | 98.9 | 8.0 | 87.3 | HPLC | Oligo-dT |
| 3-3A | 8.4 | 97.6 | 6.5 | 88.2 | HPLC | Oligo-dT |
| 3-5A | 2.6 | 99.7 | 8.4 | 82.4 | HPLC | Rneasy |
| 3-7B1 | 8.6 | 91.2 | <2 | 75.6 | HPLC | Rneasy |
| 3-7B2 | 8.6 | 94.8 | <2 | 75.7 | HPLC | Rneasy |
| 3-8A2 | 8.1 | 98.4 | 0.5 | 78.9 | HPLC | Rneasy |
| 3-9A | 3.2 | 99.9 | 4.3 | 80.1 | HPLC | Rneasy |
| 3-12A | 2.3 | 99.7 | 5.3 | 77.4 | HPLC | Rneasy |
| 3-13A | 3.0 | 100.0 | 4.1 | 80.5 | HPLC | Rneasy |
| 3-1B | 10.9 | 98.2 | 6.9 | 87.1 | HPLC | Oligo-dT |
| 3-3B | 8.3 | 96.9 | 4.8 | 88.0 | HPLC | Oligo-dT |
| 3-5B | 3.0 | 99.7 | 8.3 | 81.0 | HPLC | Rneasy |
| 3-6B1 | 1.8 | 91.2 | <2 | 75.6 | HPLC | Oligo-dT |
| 3-6B2 | 2.9 | 94.8 | <2 | 75.7 | HPLC | Oligo-dT |
| 3-9B | 3.7 | 99.9 | 4.5 | 80.2 | HPLC | Rneasy |
| 3-11B | 3.0 | 100.0 | 6.5 | 81.7 | HPLC | Rneasy |
| 3-12B | 3.3 | 100.0 | 3.7 | 88.1 | HPLC | Rneasy |
| 3-13B | 3.2 | 100.0 | 5.0 | 80.7 | HPLC | Rneasy |

Table S4. Structures and analytical data for synthesized TCP-mRNAs (Fluc)

| 5’-TCP cap origine  and analytical data | Structure of 5’-end of synthesized TCP-mRNA |
| --- | --- |
|  |  |
| 1-1A  Purification: Oligo-dT  Full length TCP-mRNA area, 94% (HPLC)  Capping, 98.0%  dsRNA, < 2 ng/μg |  |
|  |  |
| 1-2A  Purification: Oligo-dT  Full length TCP-mRNA area, 83% (HPLC)  Capping, 96.9%  dsRNA, 2.2 ng/μg |  |
|  |  |
| 1-3A  Purification: Oligo-dT  Full length TCP-mRNA area, 82% (HPLC)  Capping, 97.0%  dsRNA, 2 ng/μg |  |
|  |  |
| 1-4A  Purification: Oligo-dT  Full length TCP-mRNA area, 89% (HPLC)  Capping, 95.9%  dsRNA, < 2 ng/μg |  |
|  |  |
| 1-5A  Purification: RNeasy  Full length TCP-mRNA area, 77% (HPLC)  Capping, 97.6%  dsRNA, 2.8 ng/μg | HO  S  NH2 |
|  |  |
| 1-7A  Purification: Oligo-dT  Full length TCP-mRNA area, 88% (FA)  Capping, 100% (no uncapped mRNA was detected)  dsRNA, < 2 ng/μg |  |
|  |  |
| 1-8A  Purification: Oligo-dT  Full length TCP-mRNA area, 88% (FA)  Capping, 99.4%  dsRNA, 2.9 ng/μg |  |
|  |  |
| 1-11A  Purification: Oligo-dT  Full length TCP-mRNA area, 92% (HPLC)  Capping, 97.9%  dsRNA, 5.7 ng/μg |  |
|  |  |
| 1-12A  Purification: RNeasy  Full length TCP-mRNA area, 78% (HPLC)  Capping, 98.0%  dsRNA, 3.9 ng/μg |  |
|  |  |
| 1-13A  (7mG: L-sugar isomer)  Purification: RNeasy  Full length TCP-mRNA area, 76% (HPLC)  Capping, 99.1%  dsRNA, < 2 ng/μg |  |
|  |  |
| 1-1B  Purification: Oligo-dT  Full length TCP-mRNA area, 97% (HPLC)  Capping, 98.4%  dsRNA, 3.2 ng/μg |  |
|  |  |
| 1-2B  Purification: Oligo-dT  Full length TCP-mRNA area, 87% (HPLC)  Capping, 97.9%  dsRNA, < 2 ng/μg |  |
|  |  |
| 1-3B  Purification: Oligo-dT  Full length TCP-mRNA area, 95% (HPLC)  Capping, 98.5%  dsRNA, < 2 ng/μg |  |
|  |  |
| 1-4B  Purification: Oligo-dT  Full length TCP-mRNA area, 95% (HPLC)  Capping, 97.6%  dsRNA, < 2 ng/μg |  |
|  |  |
| 1-5B  Purification: RNeasy  Full length TCP-mRNA area, 83% (HPLC)  Capping, 99.0%  dsRNA, 2.2 ng/μg |  |
|  |  |
| 1-6B  Purification: RNeasy  Full length TCP-mRNA area, 77% (HPLC)  Capping, 99.1% (22% of capped TCP-mRNA lost 3’-azidomethyl group due to a presence of DTT in IVT mixture)  dsRNA, < 2 ng/μg |  |
|  |  |
| 1-7B  Purification: Oligo-dT  Full length TCP-mRNA area, 71% (FA)  Capping, 98.4%  dsRNA, 6.8 ng/μg |  |
|  |  |
| 1-8B  Purification: Oligo-dT  Full length TCP-mRNA area, 88% (FA)  Capping, 99.4%  dsRNA, 2.9 ng/μg |  |
|  |  |
| 1-9B  Purification: Oligo-dT  Full length TCP-mRNA area, 95% (HPLC)  Capping, 97.7%  dsRNA, < 2 ng/μg |  |
|  |  |
| 1-10B  Purification: Oligo-dT  Full length TCP-mRNA area, 85% (HPLC)  Capping, 98.4%  dsRNA, < 2 ng/μg |  |
|  |  |
| 1-12B  Purification: RNeasy  Full length TCP-mRNA area, 79% (HPLC)  Capping, 99.0%  dsRNA, 3.9 ng/μg |  |
|  |  |
| 1-13B  (7mG: L-sugar isomer)  Purification: RNeasy  Full length TCP-mRNA area, 79% (HPLC)  Capping, 99.4%  dsRNA, 2.9 ng/μg |  |
|  |  |
| 1-14B  Purification: RNeasy  Full length TCP-mRNA area, 80% (HPLC)  Capping, 99.5%  dsRNA, < 2 ng/μg |  |
|  |  |
| 1-15B  Purification: Oligo-dT  Full length TCP-mRNA area, 94% (FA)  Capping, 99.3%  dsRNA, 2.4 ng/μg |  |
|  |  |
| 2-2A  Purification: RNeasy  Full length TCP-mRNA area, 80% (HPLC)  Capping, 95.7%  dsRNA, 3.0 ng/μg |  |
|  |  |
| 2-4A12  Mixture of two diastereomers  Purification: RNeasy  Full length TCP-mRNA area, 75% (HPLC)  Capping, 92.8%  dsRNA, < 2 ng/μg |  |
|  |  |
| 2-5A1  Diastereomer 1 was used to prepare the isomeric form of TCP-mRNA  Purification: RNeasy  Full length TCP-mRNA area, 76% (HPLC)  Capping, 95.5%  dsRNA, < 2 ng/μg |  |
|  |  |
| 2-5A2  Diastereomer 2 was used to prepare the isomeric form of TCP-mRNA  Purification: RNeasy  Full length TCP-mRNA area, 75% (HPLC)  Capping, 94.9%  dsRNA, < 2 ng/μg |  |
|  |  |
| 2-7A  Purification: RNeasy  Full length TCP-mRNA area, 78% (HPLC)  Capping, 98.3%  dsRNA, 2.8 ng/μg |  |
|  |  |
| 2-8A  Purification: Oligo-dT  Full length TCP-mRNA area, 86% (FA)  Capping, 100% (uncapped mRNA was not detected)  dsRNA, < 2 ng/μg |  |
|  |  |
| 2-10A  Purification: Oligo-dT  Full length TCP-mRNA area, 92% (FA)  Capping, 97.0%  dsRNA, 3.5 ng/μg |  |
|  |  |
| 2-11A  Purification: Oligo-dT  Full length TCP-mRNA area, 92% (FA)  Capping, 97.2%  dsRNA, < 2 ng/μg |  |
|  |  |
| 2-2B  Purification: RNeasy  Full length TCP-mRNA area, 82% (HPLC)  Capping, 98.7%  dsRNA, 2.6 ng/μg |  |
|  |  |
| 2-3B  Purification: RNeasy  Full length TCP-mRNA area, 77%  Capping, 96.1%  dsRNA, <2 ng/μg |  |
|  |  |
| 2-4B12  Mixture of two diastereomers  Purification: Oligo-dT  Full length TCP-mRNA area, 79% (FA)  Capping, 93.9%  dsRNA, 3.7 ng/μg |  |
|  |  |
| 2-5B1  Diastereomer 1 was used to prepare the isomeric form of TCP-mRNA  Purification: Oligo-dT  Full length TCP-mRNA area, 91%  Capping, 96.5%  dsRNA, 4.0 ng/μg |  |
|  |  |
| 3-1A  Purification: Oligo-dT  Full length TCP-mRNA area, 87% (HPLC)  Capping, 98.9%  dsRNA, < 2 ng/μg |  |
|  |  |
| 3-3A  Purification: Oligo-dT  Full length TCP-mRNA area, 88% (FA)  Capping, 97.6%  dsRNA, 6.5 ng/μg |  |
|  |  |
| 3-5A  Purification: RNeasy  Full length TCP-mRNA area, 82% (HPLC)  Capping, 99.7%  dsRNA, 8.4 ng/μg |  |
|  |  |
| 3-8A2  Diastereomer 2 was used to prepare the isomeric form of TCP-mRNA  Purification: RNeasy  Full length TCP-mRNA area, 79% (HPLC)  Capping, 98.4%  dsRNA, < 2 ng/μg |  |
|  |  |
| 3-9A  Purification: RNeasy  Full length TCP-mRNA area, 80% (HPLC)  Capping, 100% (traces of uncapped mRNA <0.1%)  dsRNA, 4.3 ng/μg |  |
|  |  |
| 3-12A  Purification: RNeasy  Full length TCP-mRNA area, 77% (HPLC)  Capping, 99.7%  dsRNA, 5.3 ng/μg |  |
|  |  |
| 3-13A  Purification: RNeasy  Full length TCP-mRNA area, 81% (HPLC)  Capping, 100% (no detectable uncapped mRNA)  dsRNA, 4.1 ng/μg |  |
|  |  |
| 3-1B  Purification: Oligo-dT  Full length TCP-mRNA area, 87% (HPLC)  Capping, 98.2%  dsRNA, 6.6 ng/μg |  |
|  |  |
| 3-3B  Purification: Oligo-dT  Full length TCP-mRNA area, 88% (FA)  Capping, 96.9%  dsRNA, 4.8 ng/μg |  |
|  |  |
| 3-5B  Purification: RNeasy  Full length TCP-mRNA area, 81% (HPLC)  Capping, 99.7%  dsRNA, 8.3 ng/μg |  |
|  |  |
| 3-6B1  Diastereomer 1 was used to prepare the isomeric form of TCP-mRNA  Purification: Oligo-dT  Full length TCP-mRNA area, 76% (HPLC)  Capping, 91.2%  dsRNA, < 2 ng/μg |  |
|  |  |
| 3-6B2  Diastereomer 2 was used to prepare the isomeric form of TCP-mRNA  Purification: Oligo-dT  Full length TCP-mRNA area, 76% (HPLC)  Capping, 94.8%  dsRNA, < 2 ng/μg |  |
|  |  |
| 3-7B1  Diastereomer 1 was used to prepare the isomeric form of TCP-mRNA  Purification: RNeasy  Full length TCP-mRNA area, 76% (HPLC)  Capping: 91.2%  dsRNA: < 2 ng/μg |  |
|  |  |
| 3-7B2  Diastereomer 2 was used to prepare the isomeric form of TCP-mRNA  Purification: RNeasy  Full length TCP-mRNA area, 76% (HPLC)  Capping, 94.8%  dsRNA, < 2 ng/μg |  |
|  |  |
| 3-9B  Purification: RNeasy  Full length TCP-mRNA area, 80% (HPLC)  Capping, 100% (traces of uncapped mRNA (<0.1%)  dsRNA, 4.5 ng/μg |  |
|  |  |
| 3-11B  Purification: RNeasy  Full length TCP-mRNA area, 82% (HPLC)  Capping, 100% (no detectable uncapped mRNA)  dsRNA, 6.5 ng/μg |  |
|  |  |
| 3-12B  Purification: RNeasy  Full length TCP-mRNA area, 88% (HPLC)  Capping, 100% (no detectable uncapped mRNA)  dsRNA, 3.7 ng/μg |  |
|  |  |
| 3-13B  Purification: RNeasy  Full length TCP-mRNA area, 81% (HPLC)  Capping, 100% (no detectable uncapped mRNA)  dsRNA, 5.0 ng/μg |  |

FIGURE S6.Analysis of integrity of synthesized Fluc TCP-mRNAs, containing various trinucleotide caps, by RP-HPLC or Fragment Analyzer (FA). TCP structure and method of analysis are indicated.

1-1A (RP-HPLC)


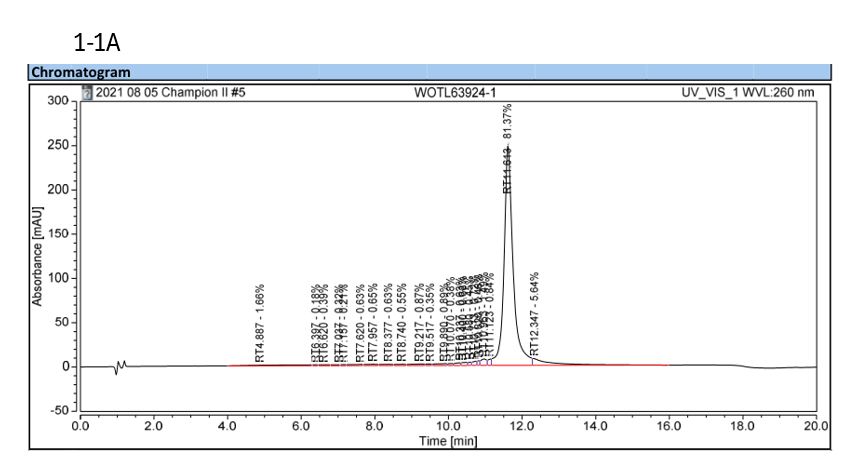


1-2A (RP-HPLC)


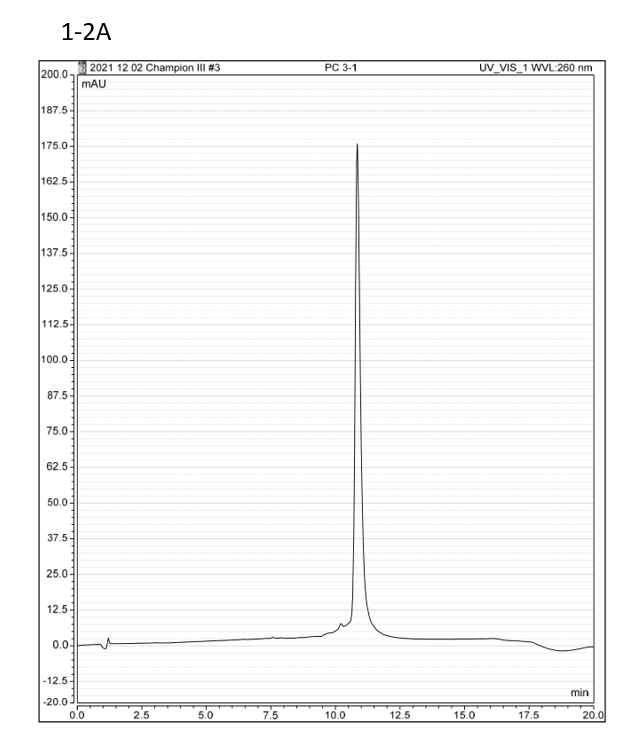


1-4A (RP-HPLC)


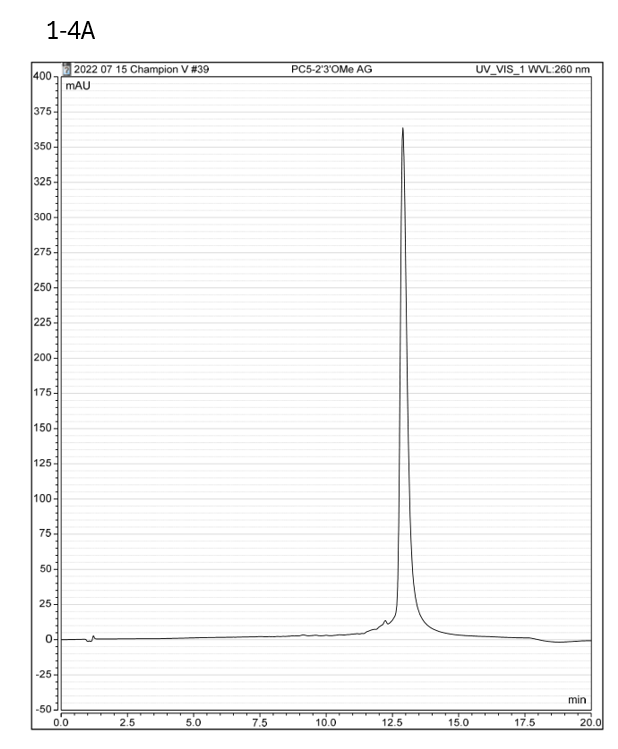


1-5A (RP-HPLC)


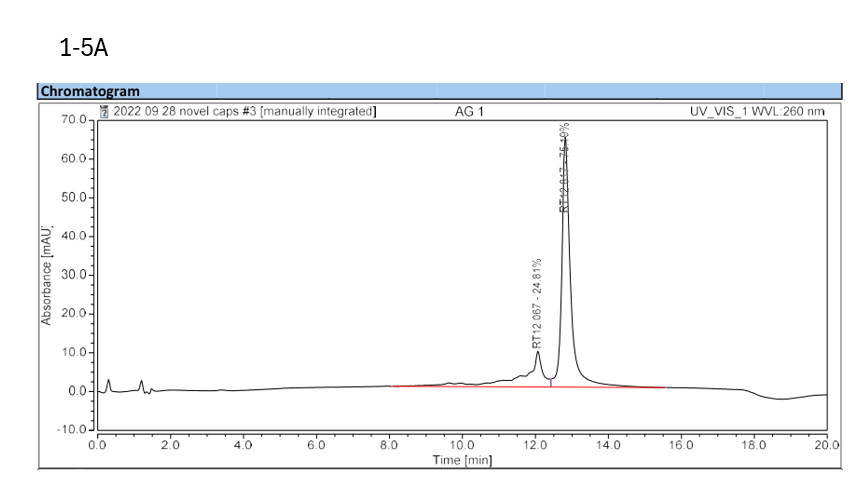


1-7A (FA)


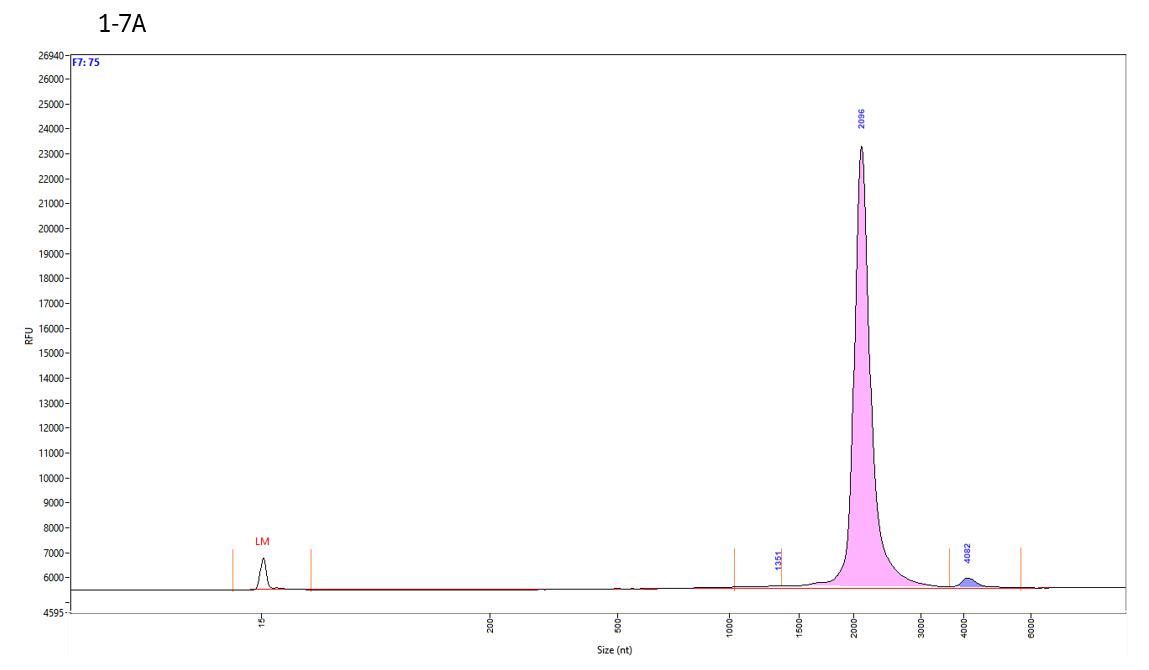


1-8A (FA)


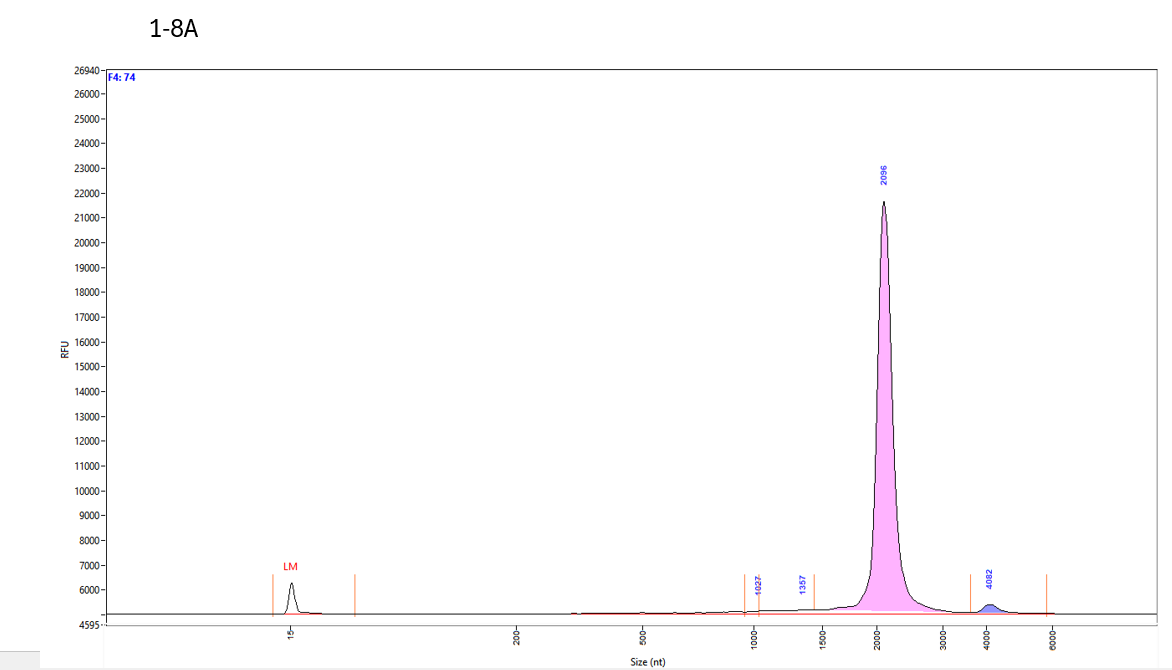


1-11A (RP-HPLC)


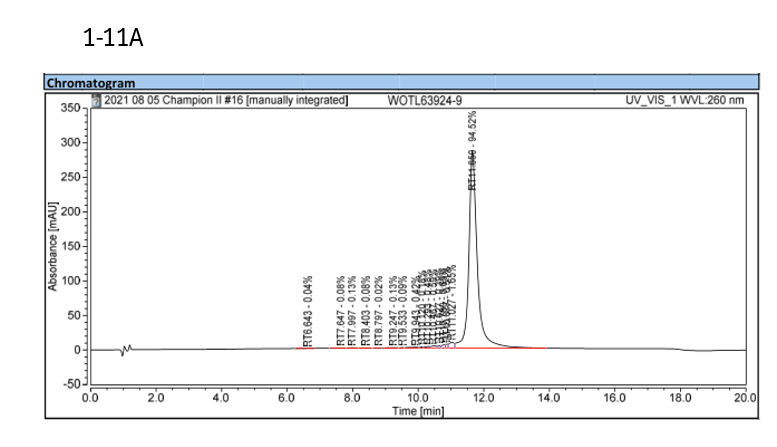


1-12A (RP-HPLC)


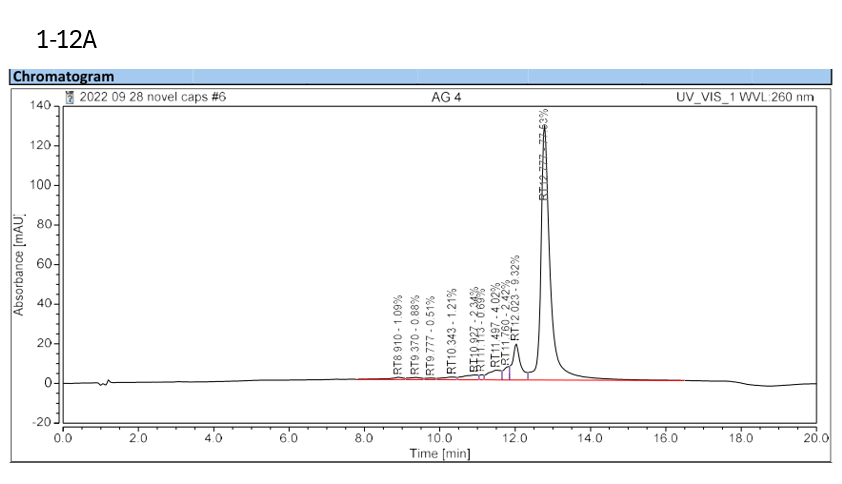


1-13A (RP-HPLC)


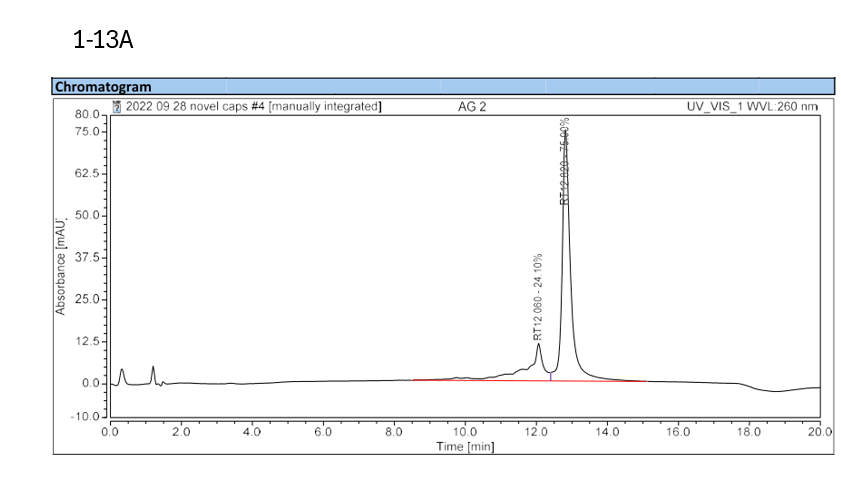


1-1B (RP-HPLC)


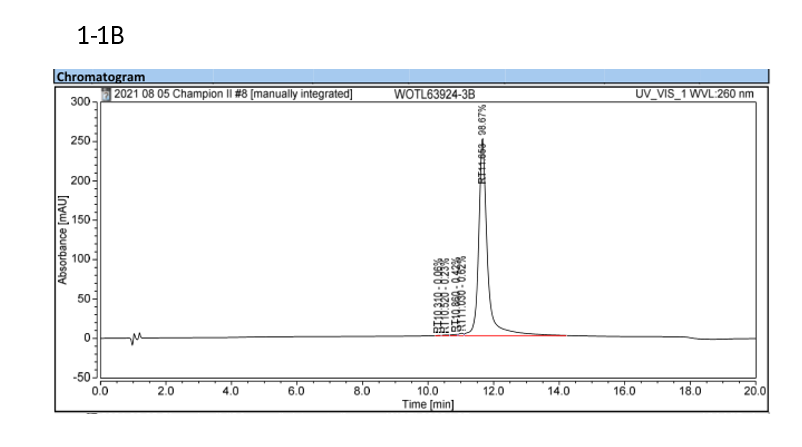


1-2B (RP-HPLC)


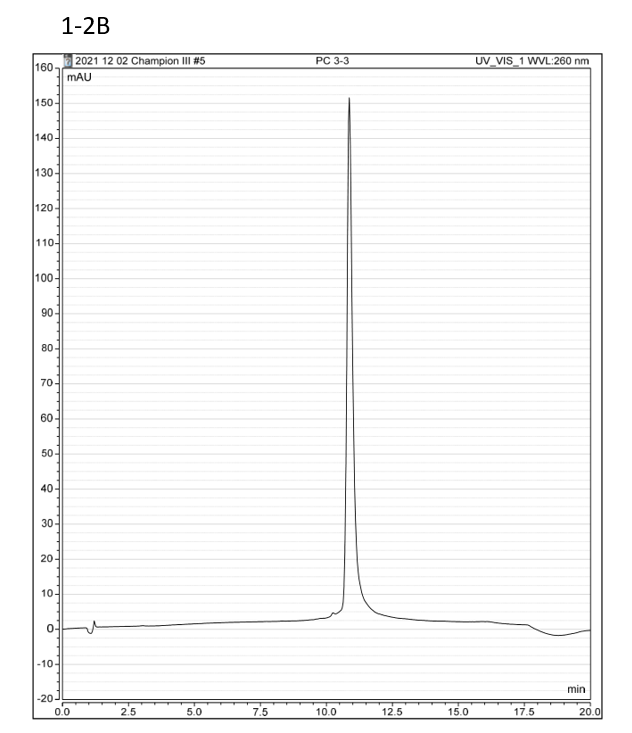


1-3B (RP-HPLC)


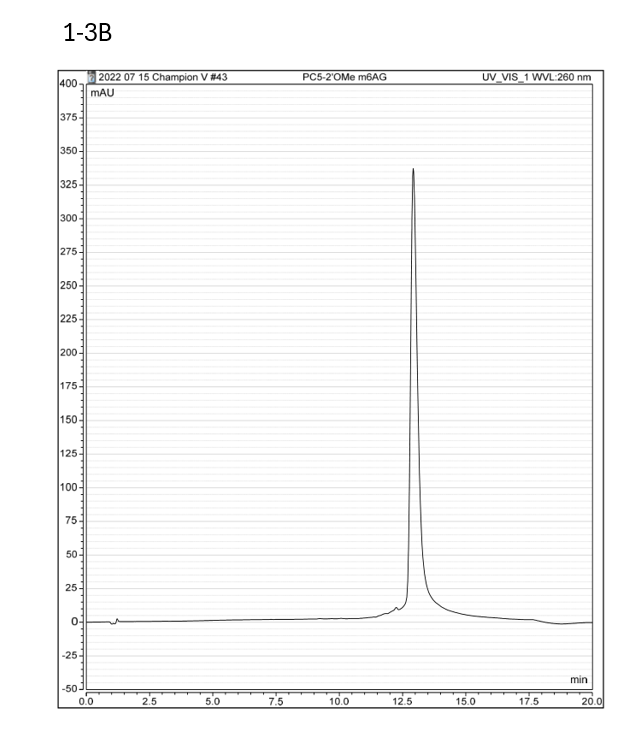


1-4B (RP-HPLC)


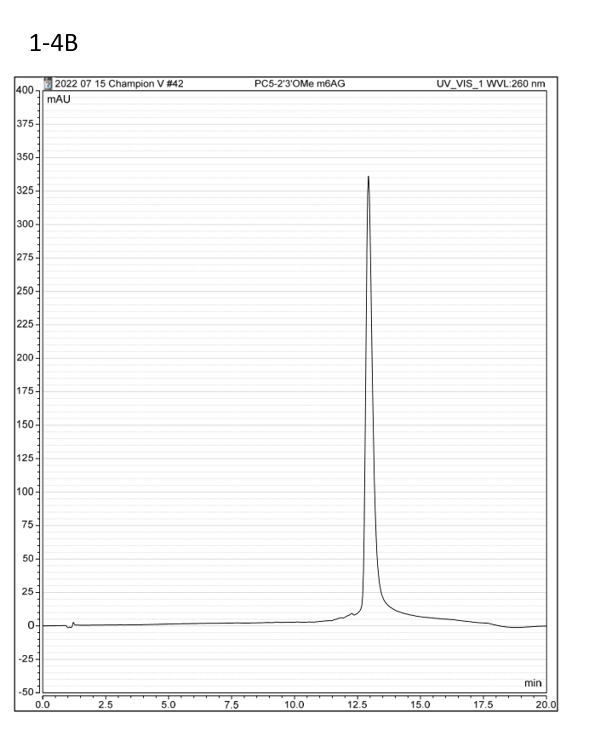


1-5B (RP-HPLC)


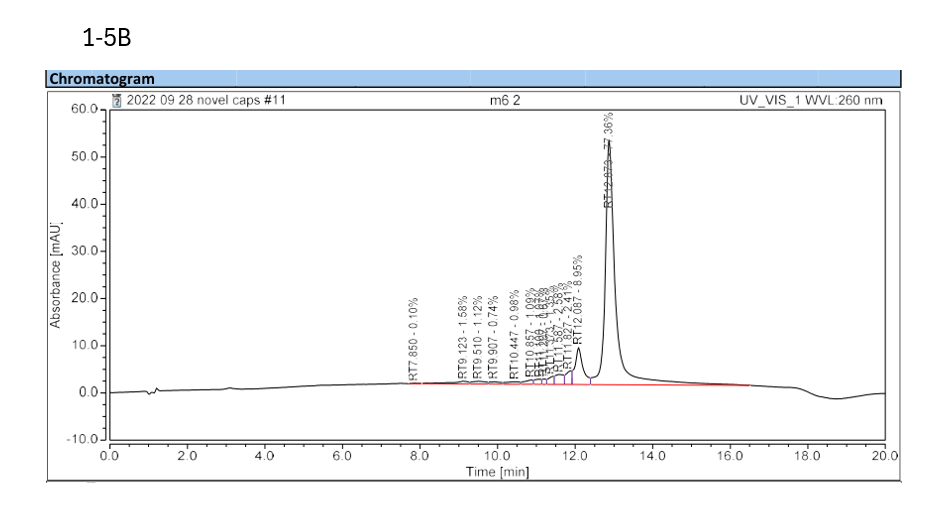


1-6B (RP-HPLC)


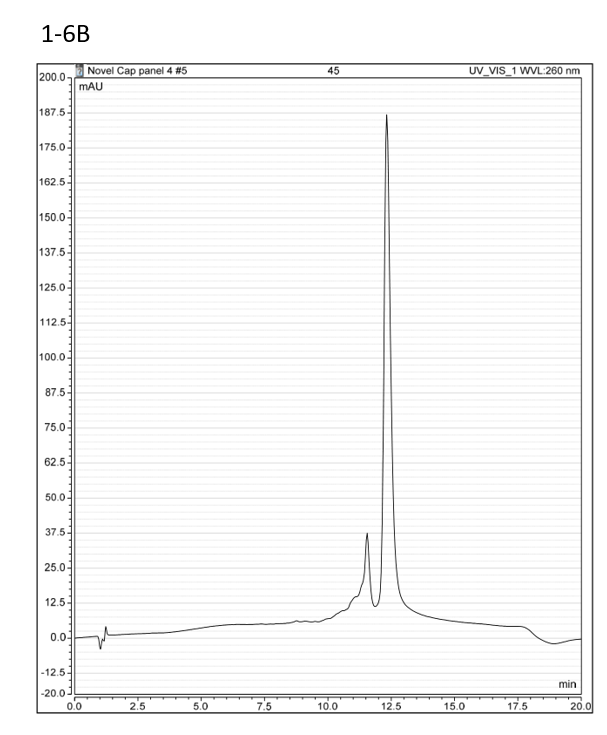


1-7B (FA)


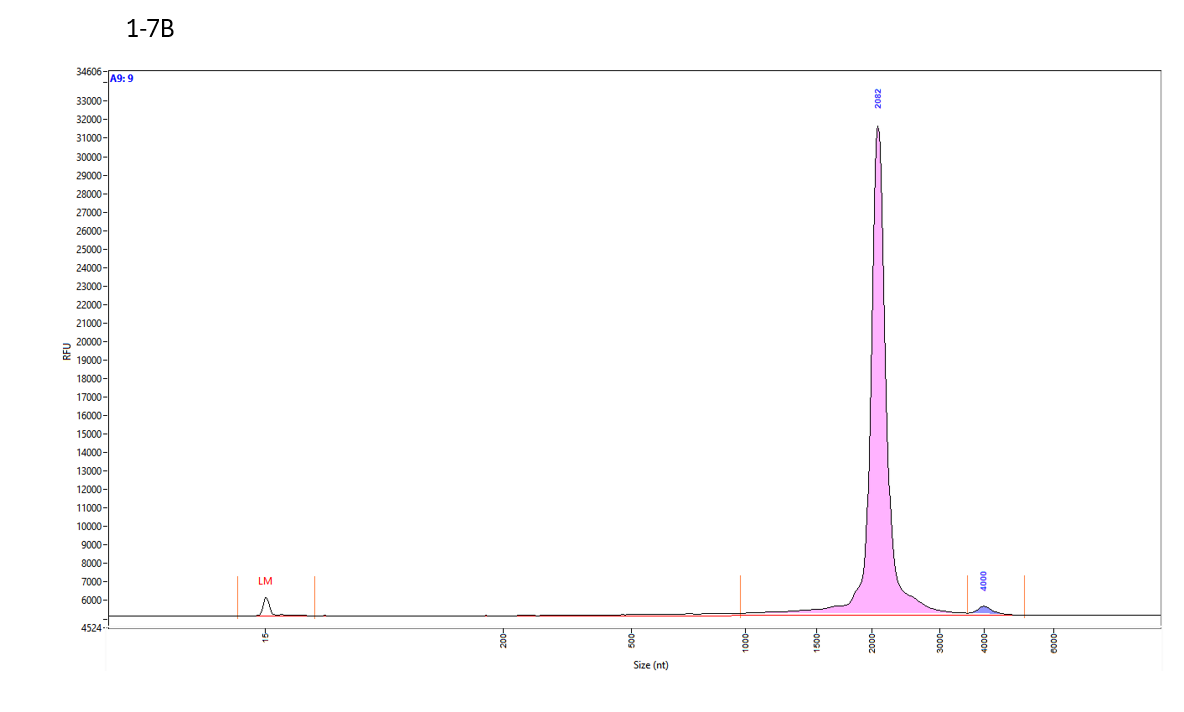


1-8B (FA)


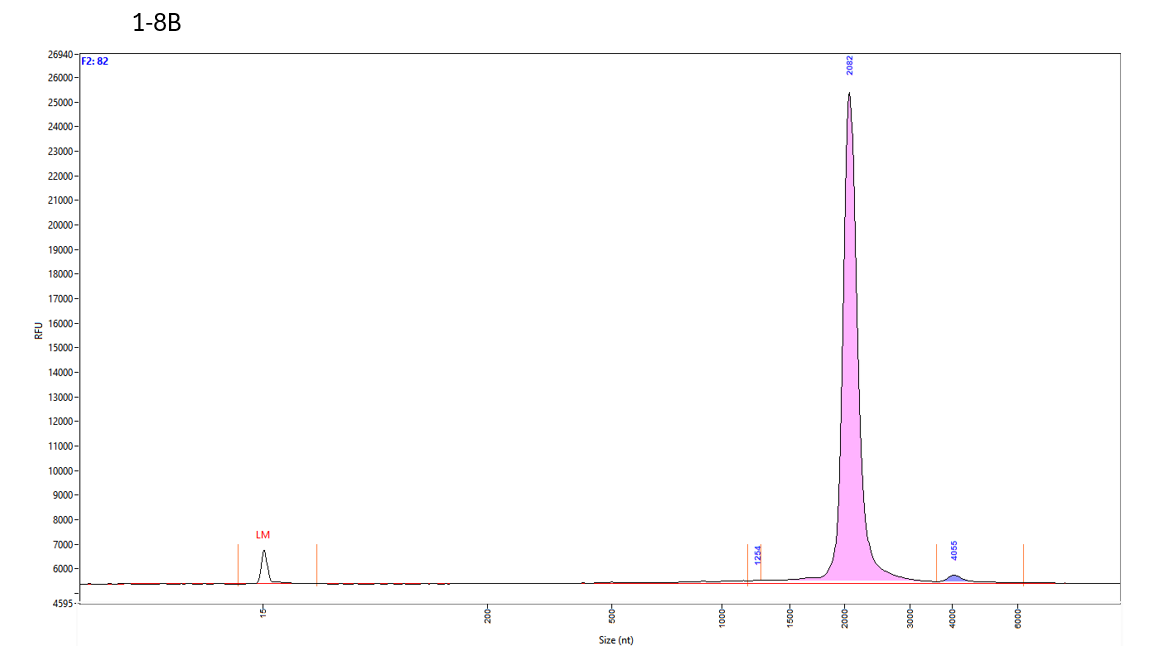


1-9B (RP-HPLC)


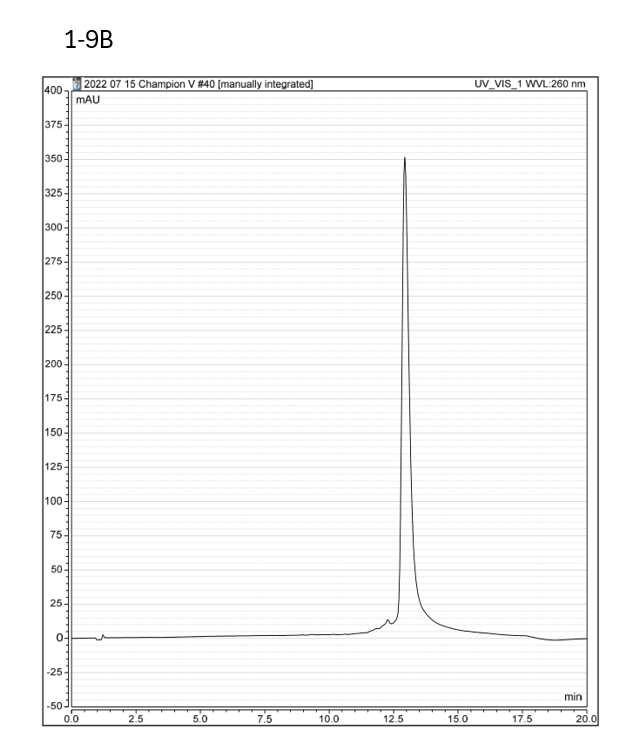


1-10B (RP-HPLC)


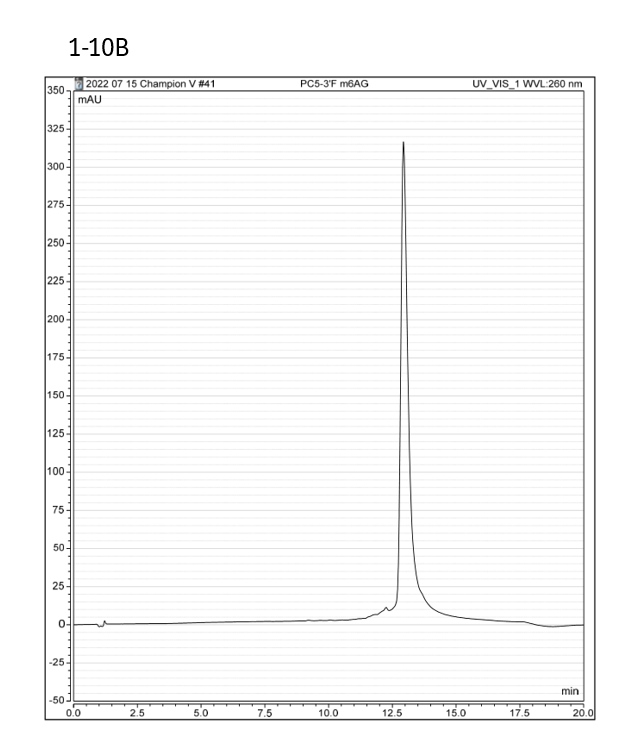


1-13B (RP-HPLC)


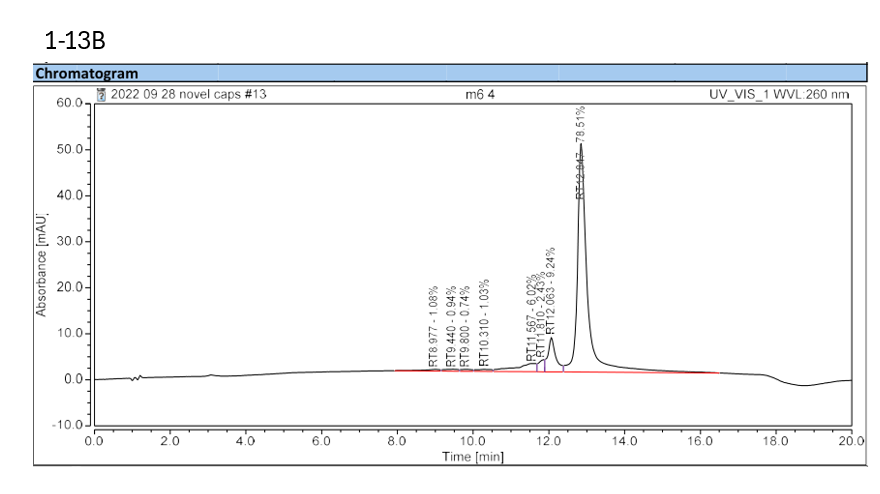


1-14B (RP-HPLC)


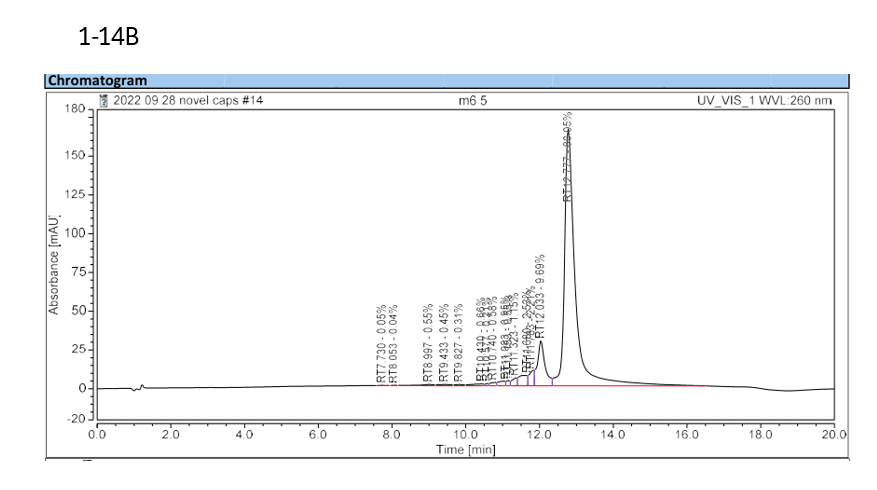


1-15B (RP-HPLC)


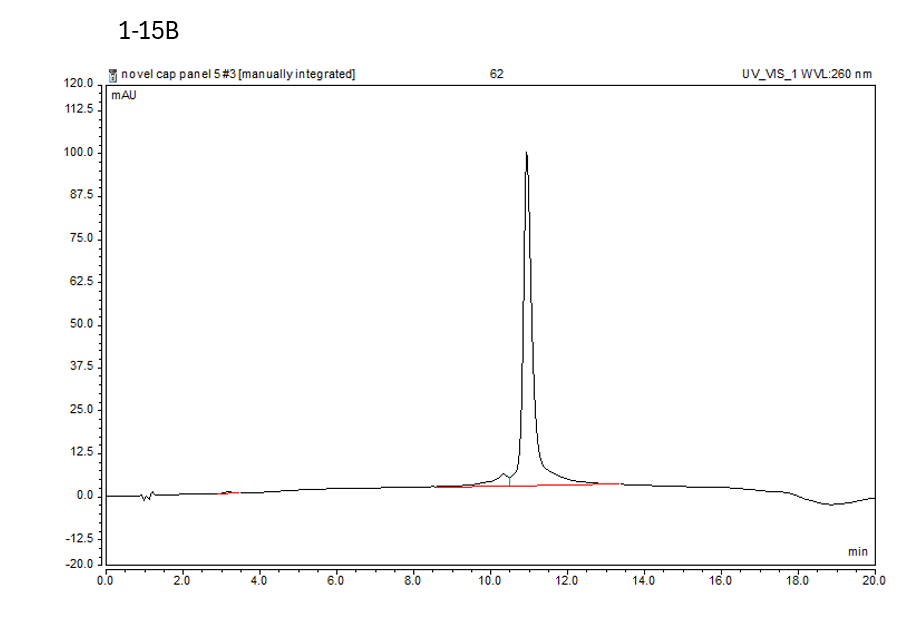


2-2A (RP-HPLC)


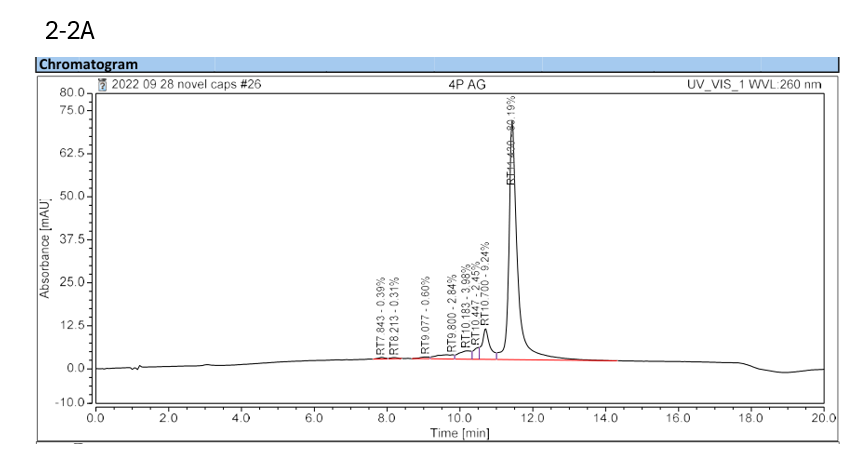


2-4A12 (RP-HPLC)


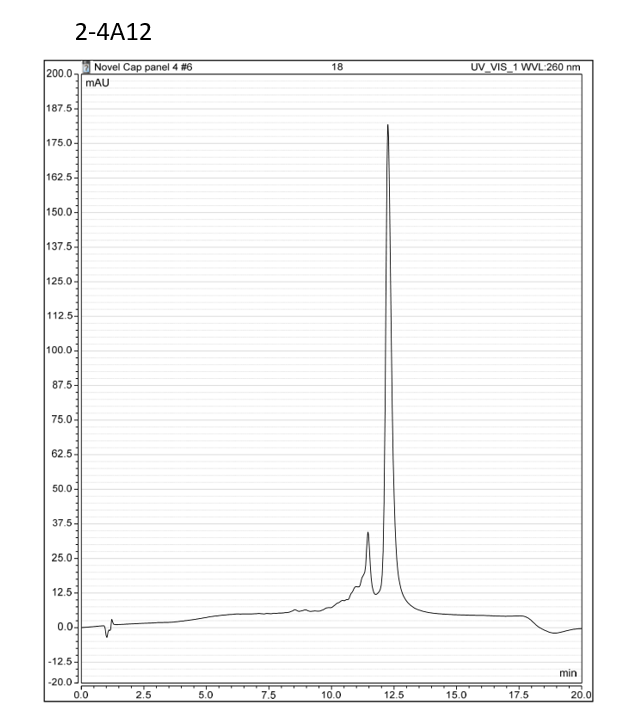


2-5A1 (RP-HPLC)


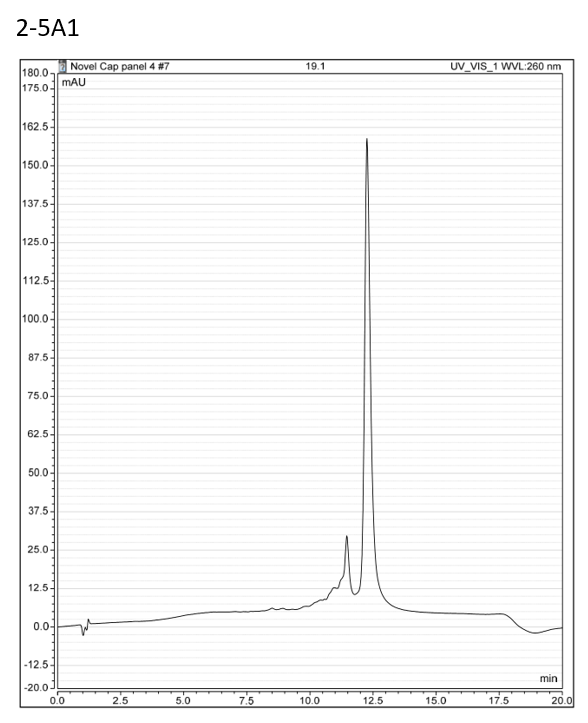


2-5A2 (RP-HPLC)


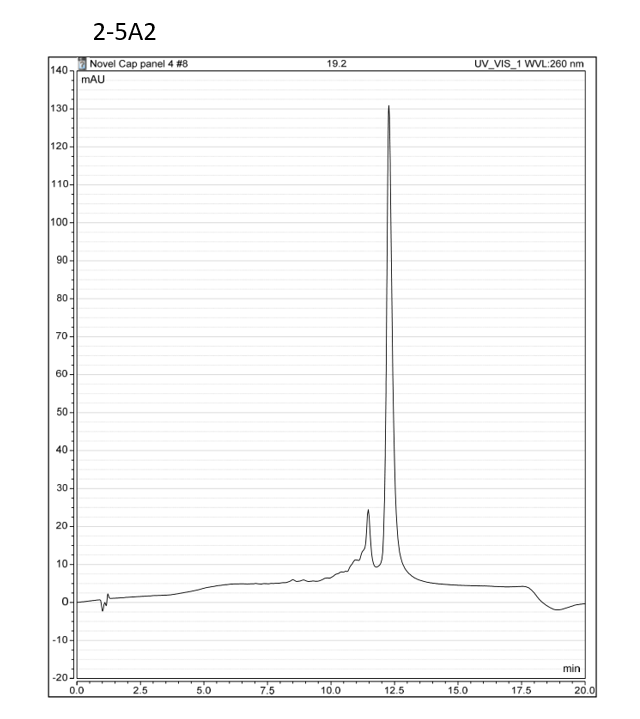


2-7A (RP-HPLC)


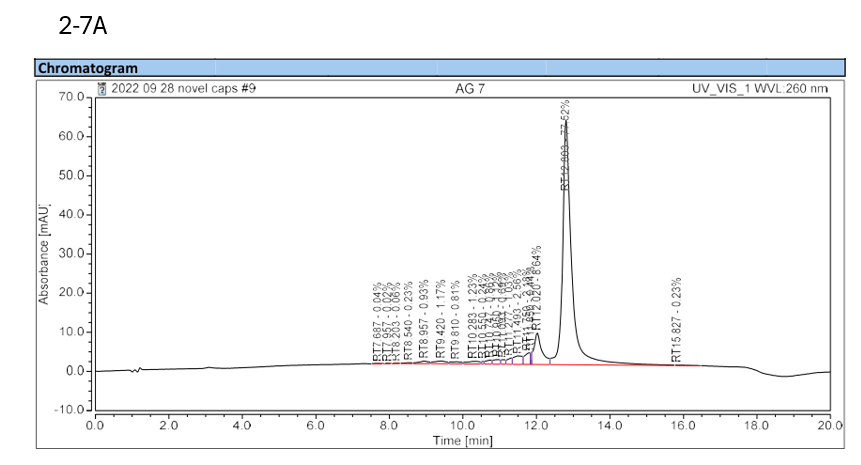


2-8A (FA)


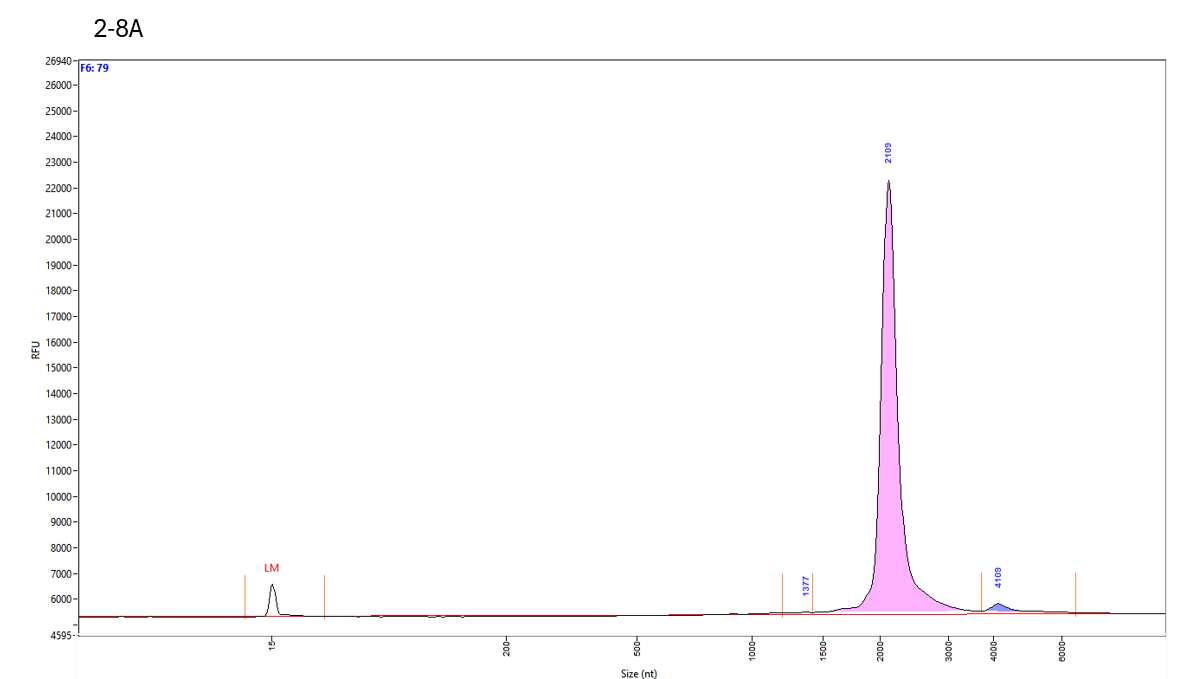


2-10A (RP-HPLC)


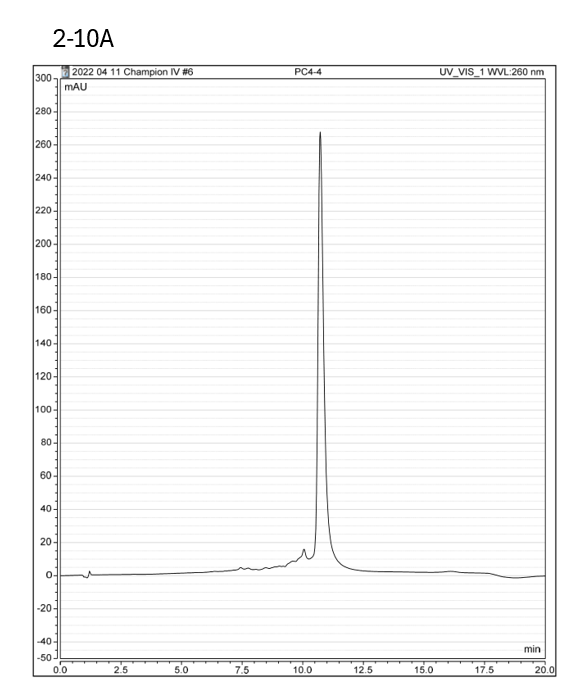


2-11A (RP-HPLC)


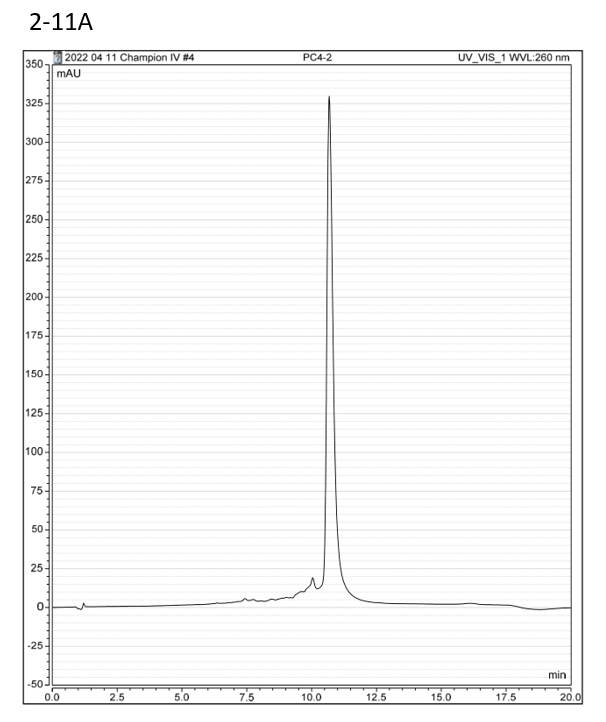


2-2B (RP-HPLC)


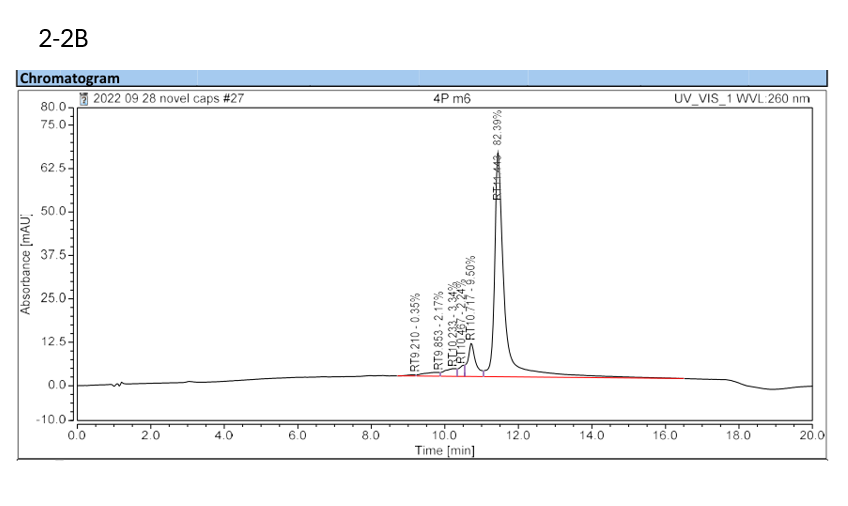


2-3B (RP-HPLC)


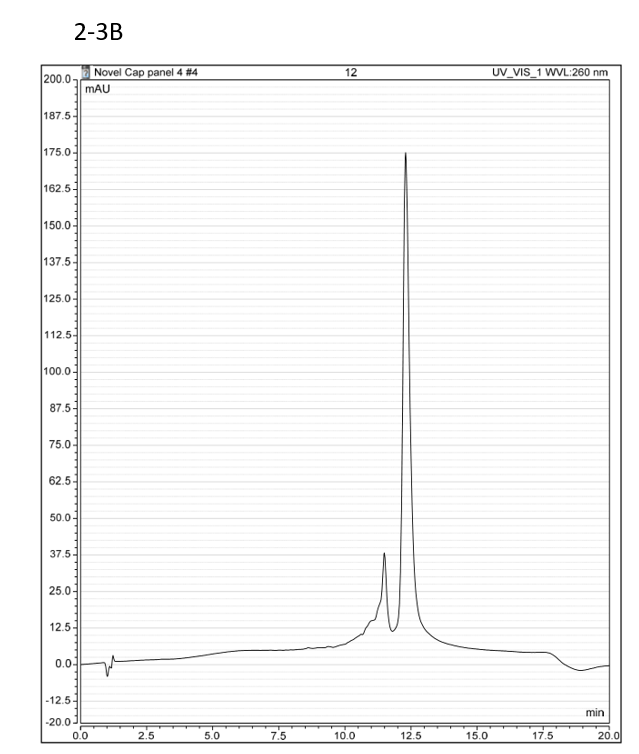


2-4B12 (FA)


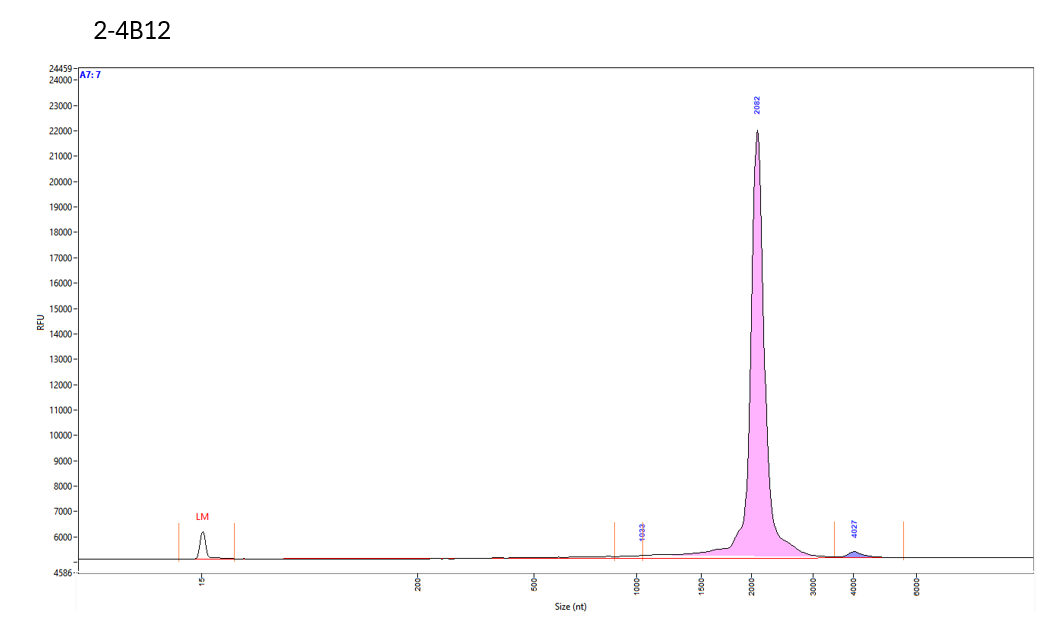


2-5B1 (RP-HPLC)


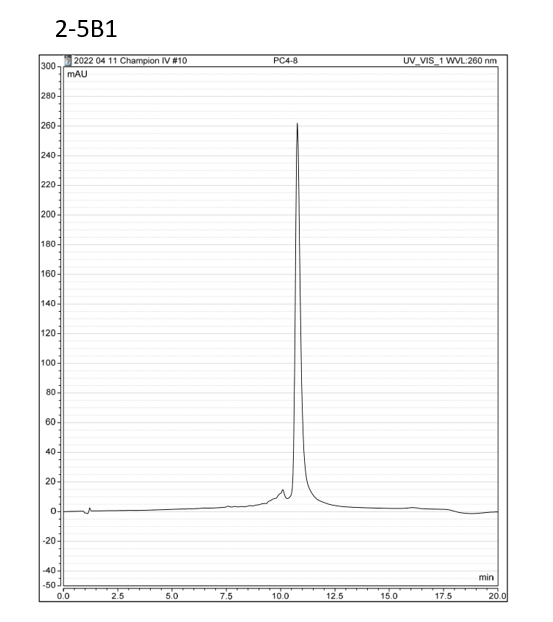


3-1A (RP-HPLC)


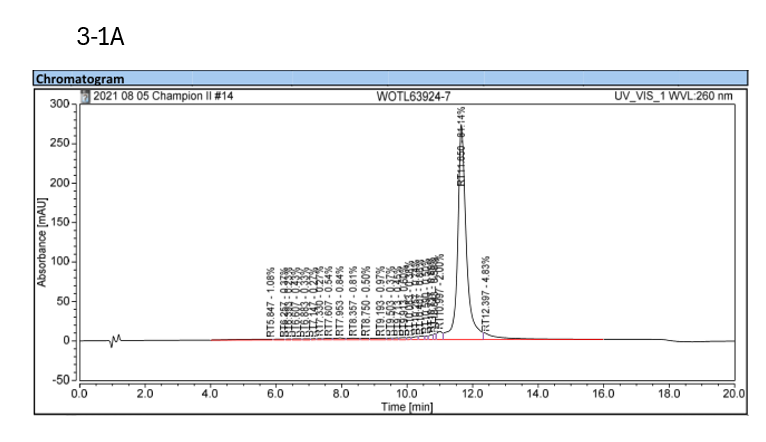


3-3A (RP-HPLC)


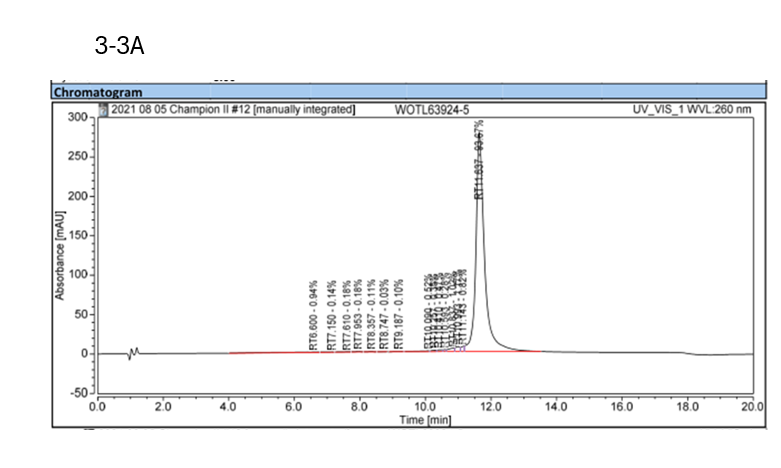


3-5A (RP-HPLC)


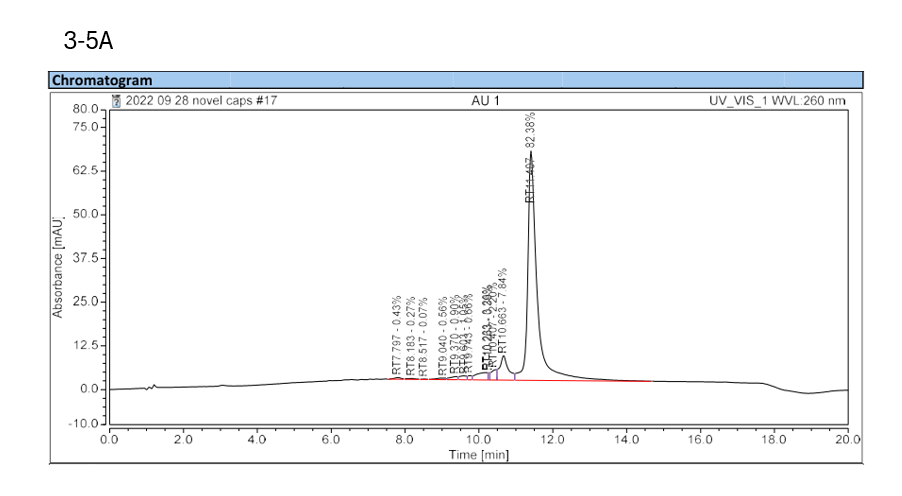


3-8A2 (RP-HPLC)


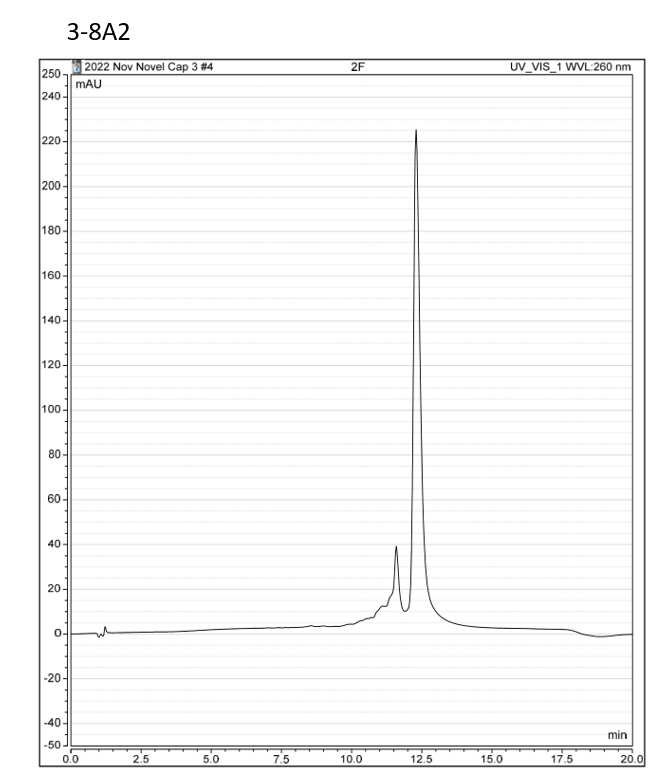


3-9A (RP-HPLC)


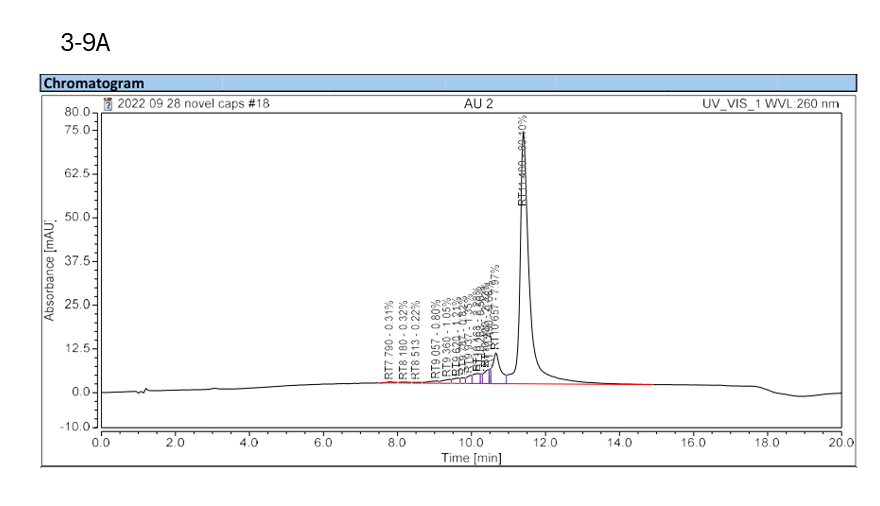


3-12A (RP-HPLC)


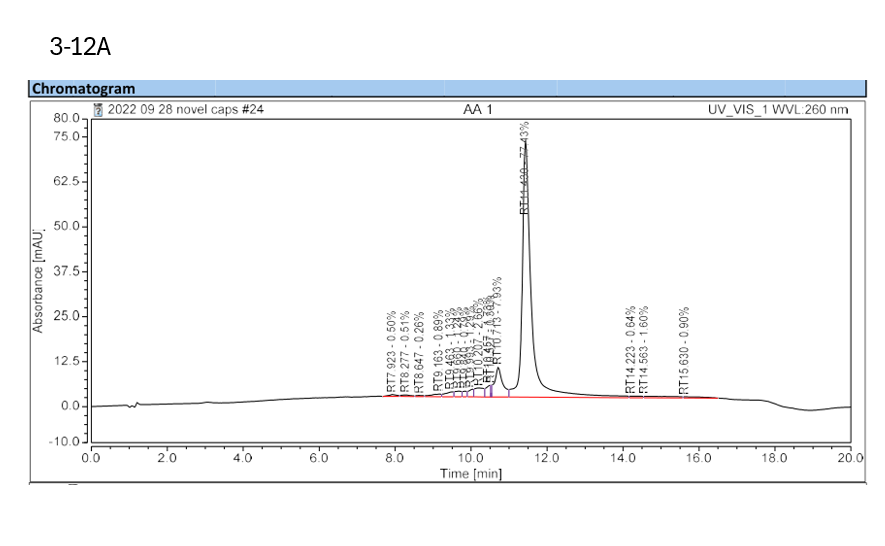


3-13A (RP-HPLC)


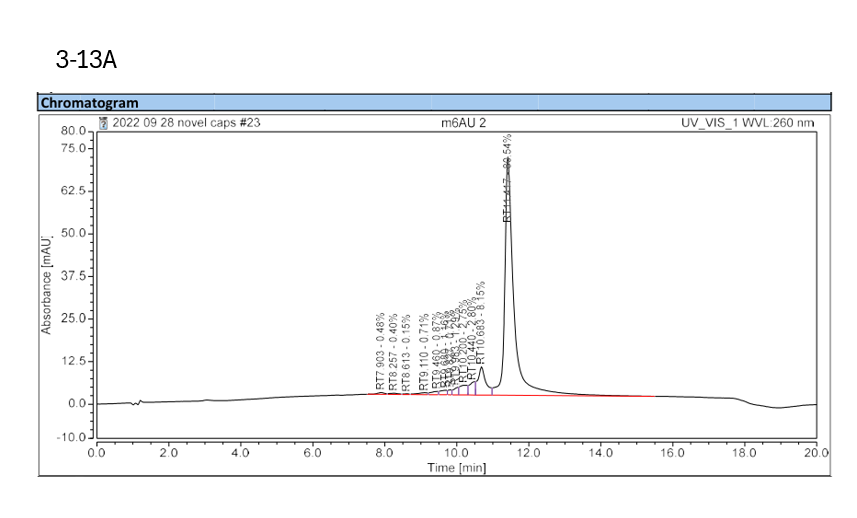


3-1B (RP-HPLC)


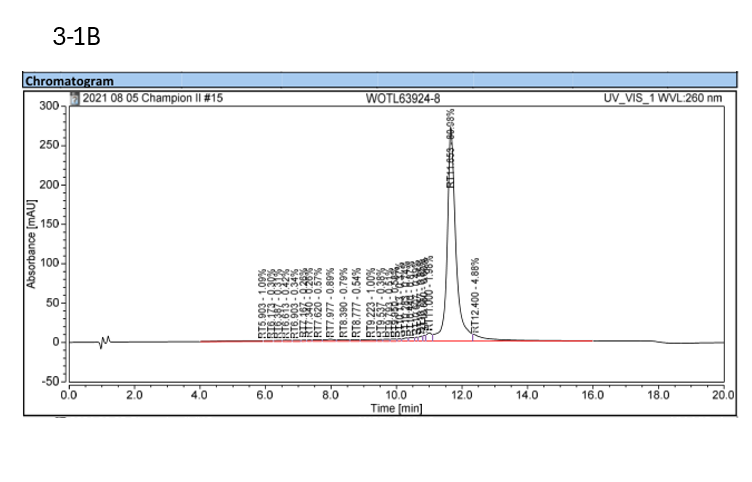


3-3B (RP-HPLC)


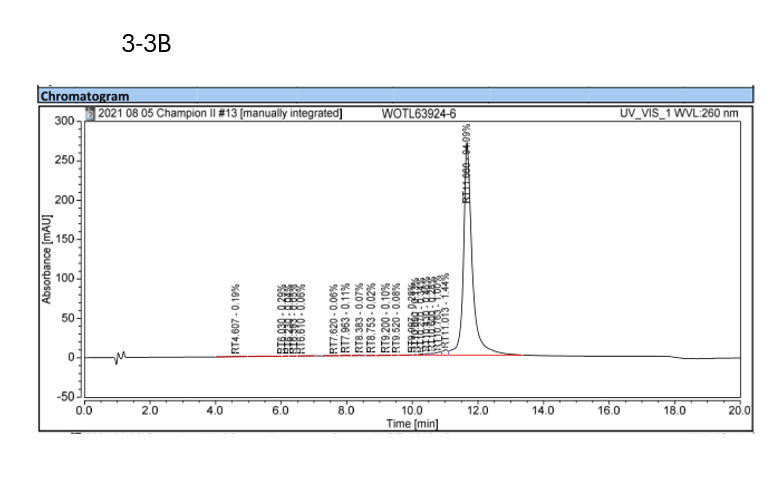


3-5B (RP-HPLC)


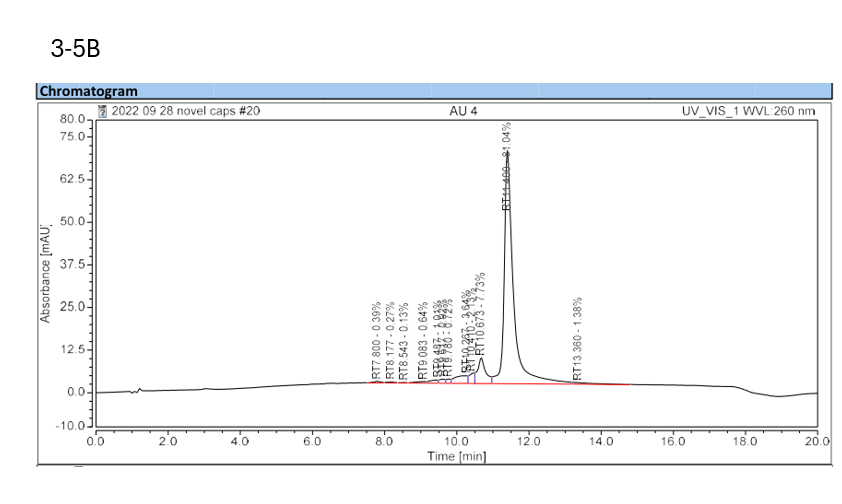


3-6B1 (RP-HPLC)


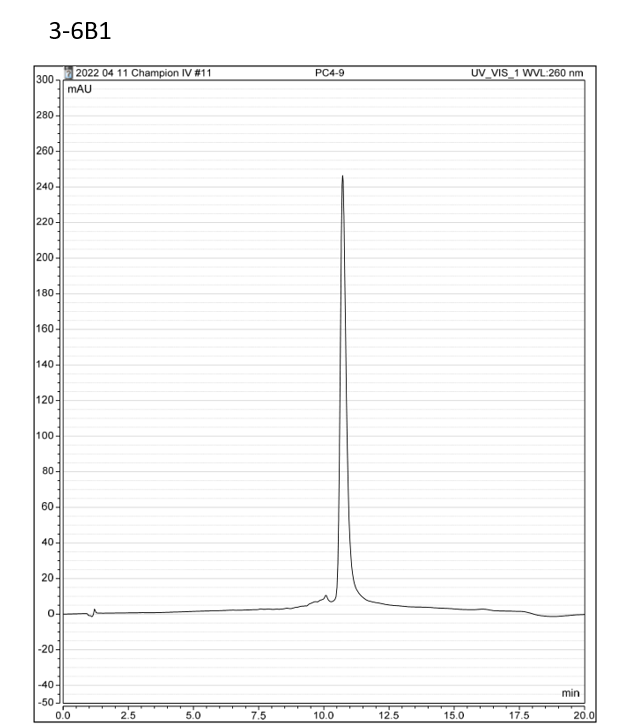


3-6B2 (RP-HPLC)


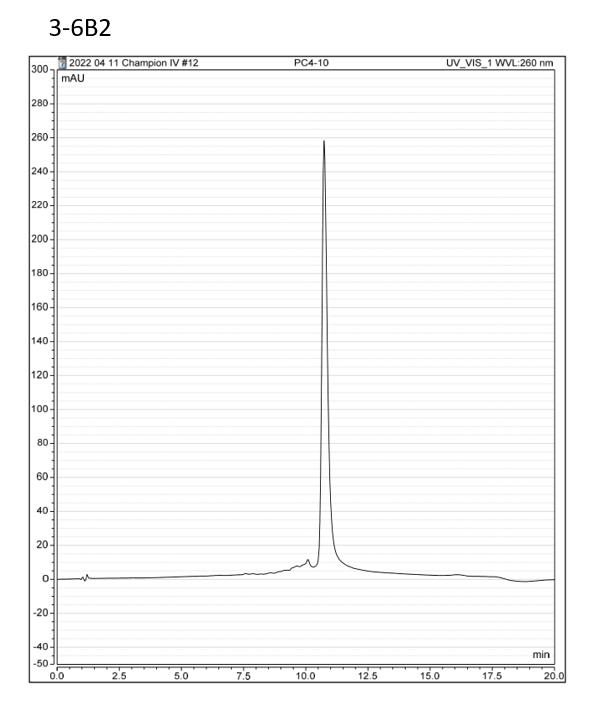


3-9B (RP-HPLC)


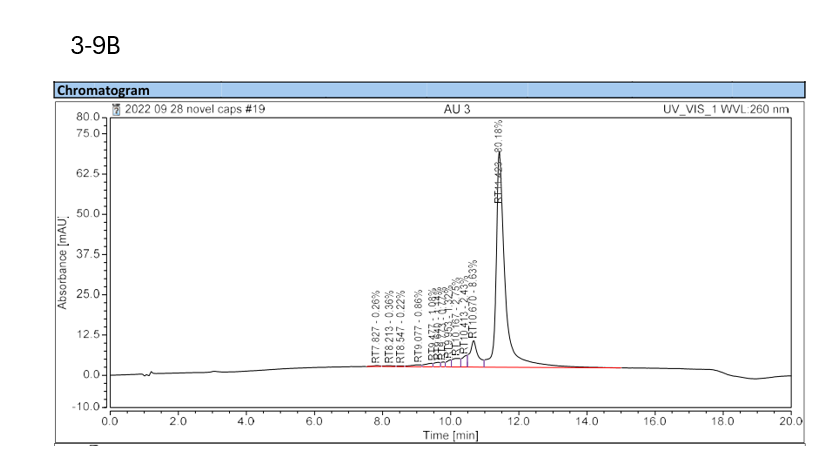


3-11B (RP-HPLC)


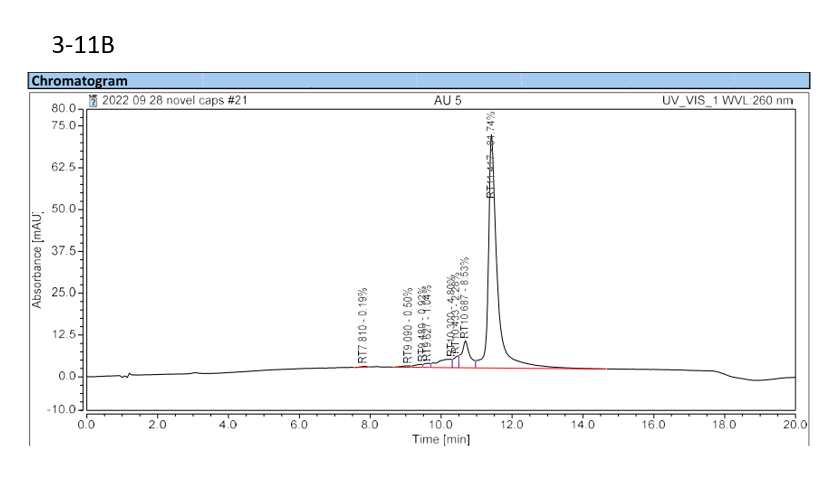


3-12B (RP-HPLC)


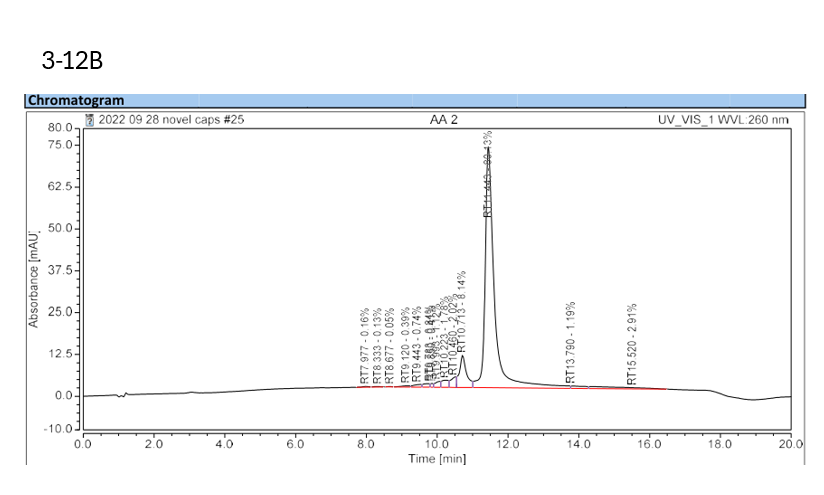


3-13B (RP-HPLC)


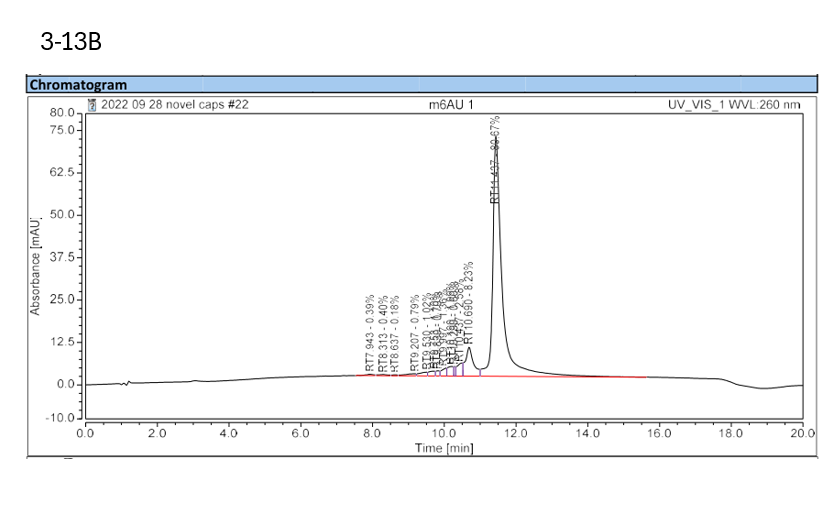


FIGURE S7 (A-H). Detection of dsRNA contaminants in TCP-mRNA samples. Evaluation of dsRNA contaminants in Fluc TCP-mRNAs was performed using Dot Blot analysis according to protocol described in reference below. Fluc TCP-mRNAs were synthesized by *in vitro* transcription using TCP analogs as transcription initiators (see Materials and Method section and Tables S3 and S4).The nucleotide sequence of synthetic dsRNA standard used in the assay is presented in accompanying file (RNA sequences).

**Reference:** Karikó,K., Muramatsu,H., Ludwig,J. and Weissman,D. (2011) Generating the optimal mRNA for therapy: HPLC purification eliminates immune activation and improves translation of nucleoside-modified, protein-encoding mRNA. Nucleic Acids Res., 39, e142.

A, Set 1


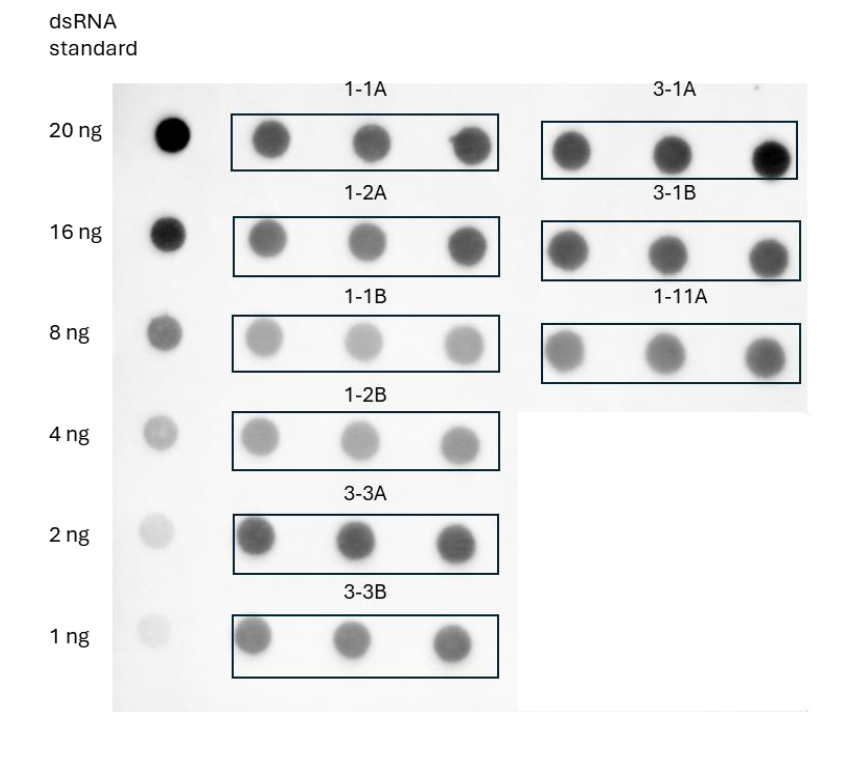


B, Set 2


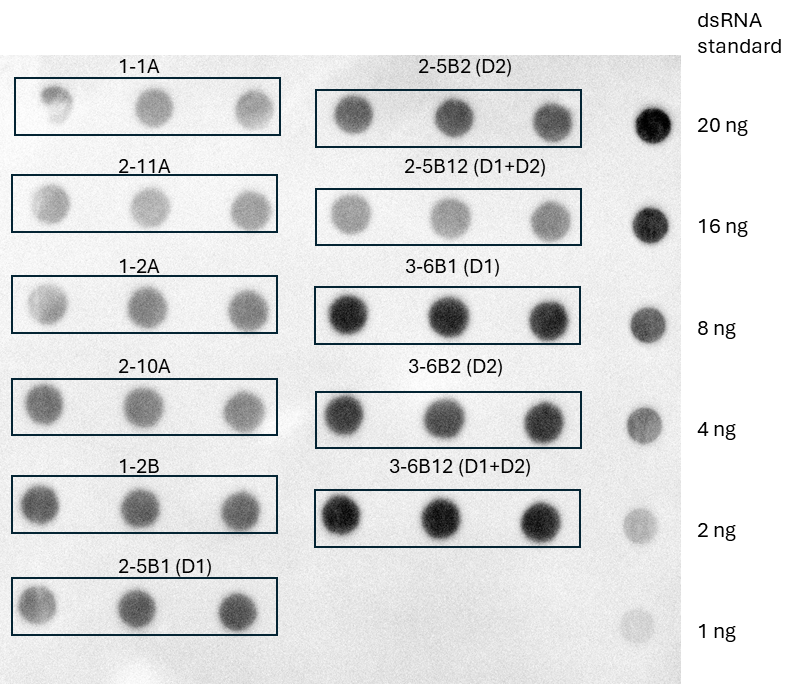


C, Set 3


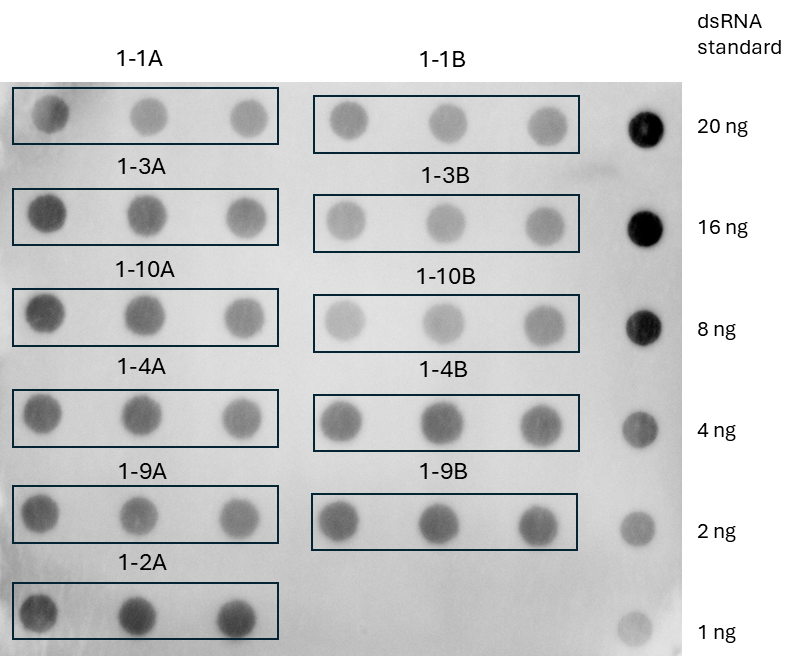


D, Set 4


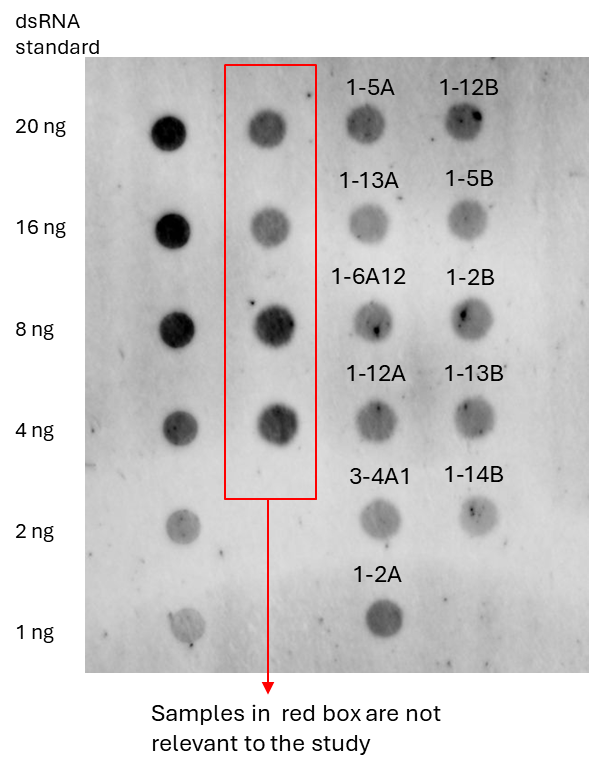


E, Set 5


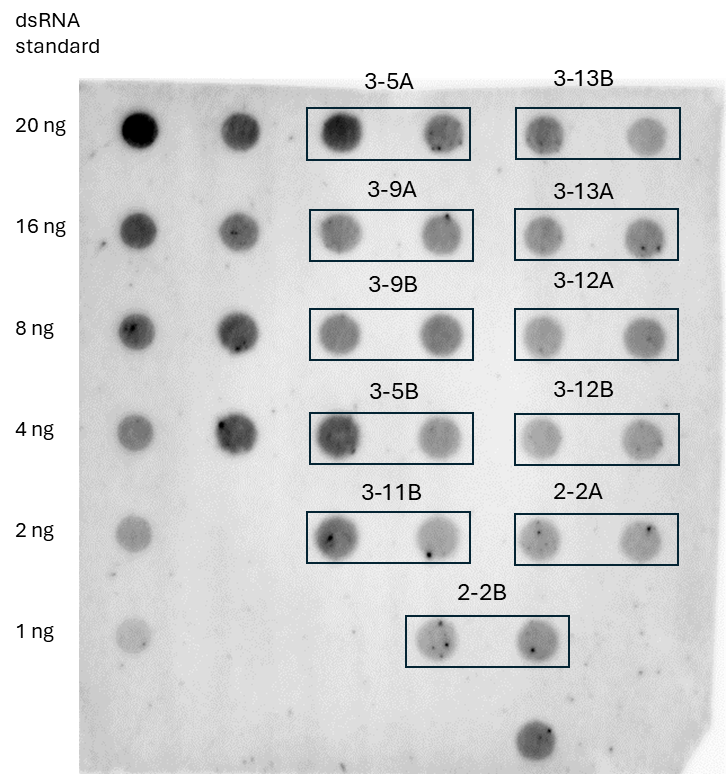


F, Set 6


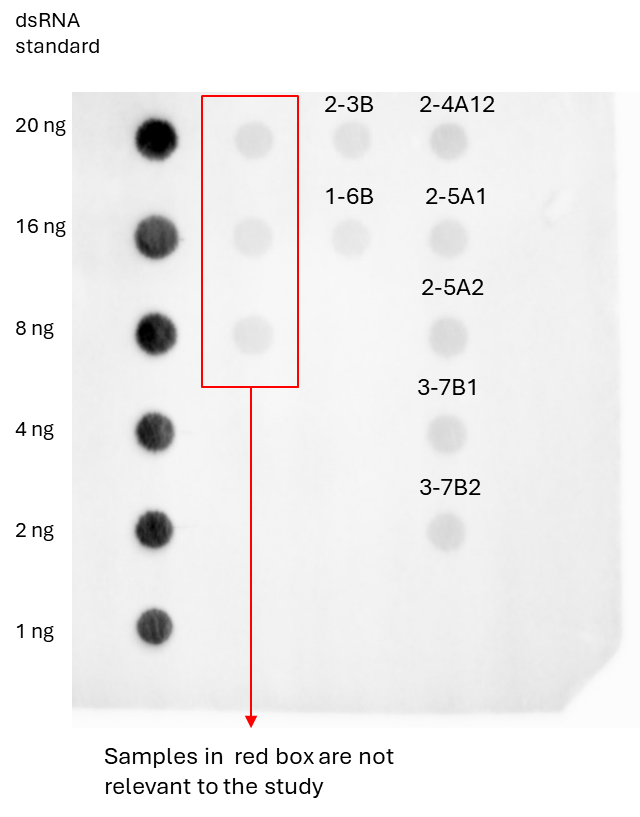


G, Set 7


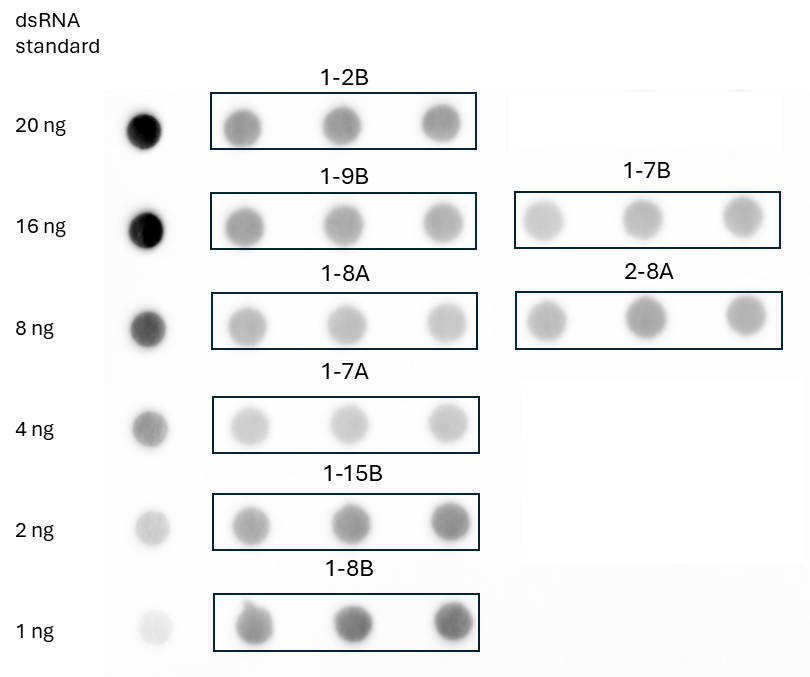


H, Set 8


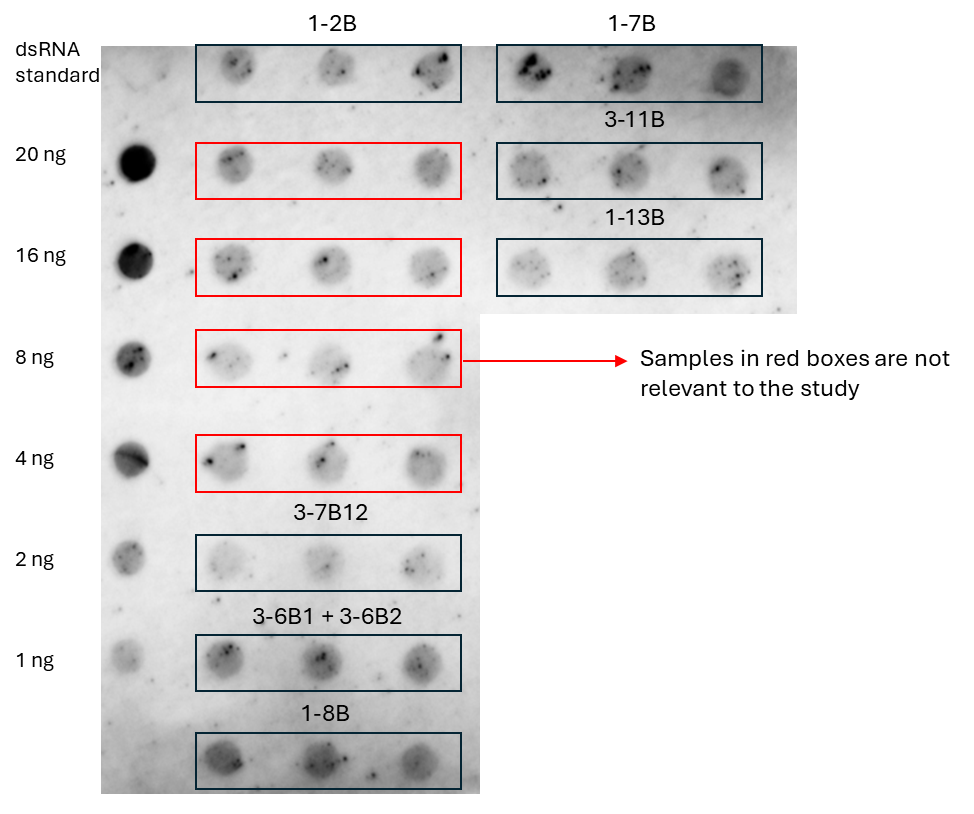


FIGURE S8. Level of dsRNA contaminants in selected TCP-mRNAs


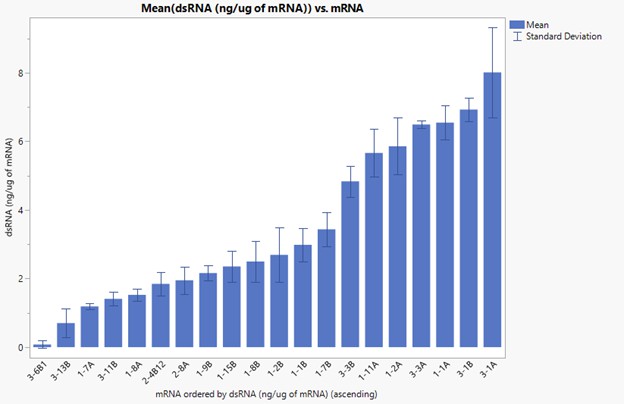


FIGURE S9A.Capping assay analytical data for TCP-mRNA synthesized on “d(TTCT)” DNA template using 7mGmppp6mAmpA (1-2B) for IVT initiation (see Fig 7). The appearance of small amount of uncapped 13-mer (4282.750) is a result of TCP contamination with p6mAmpA which initiates at +1/+2 start position.

Calculated ratio of the products (+1/+2 start)/(-1/+1 start) = 12.1:1


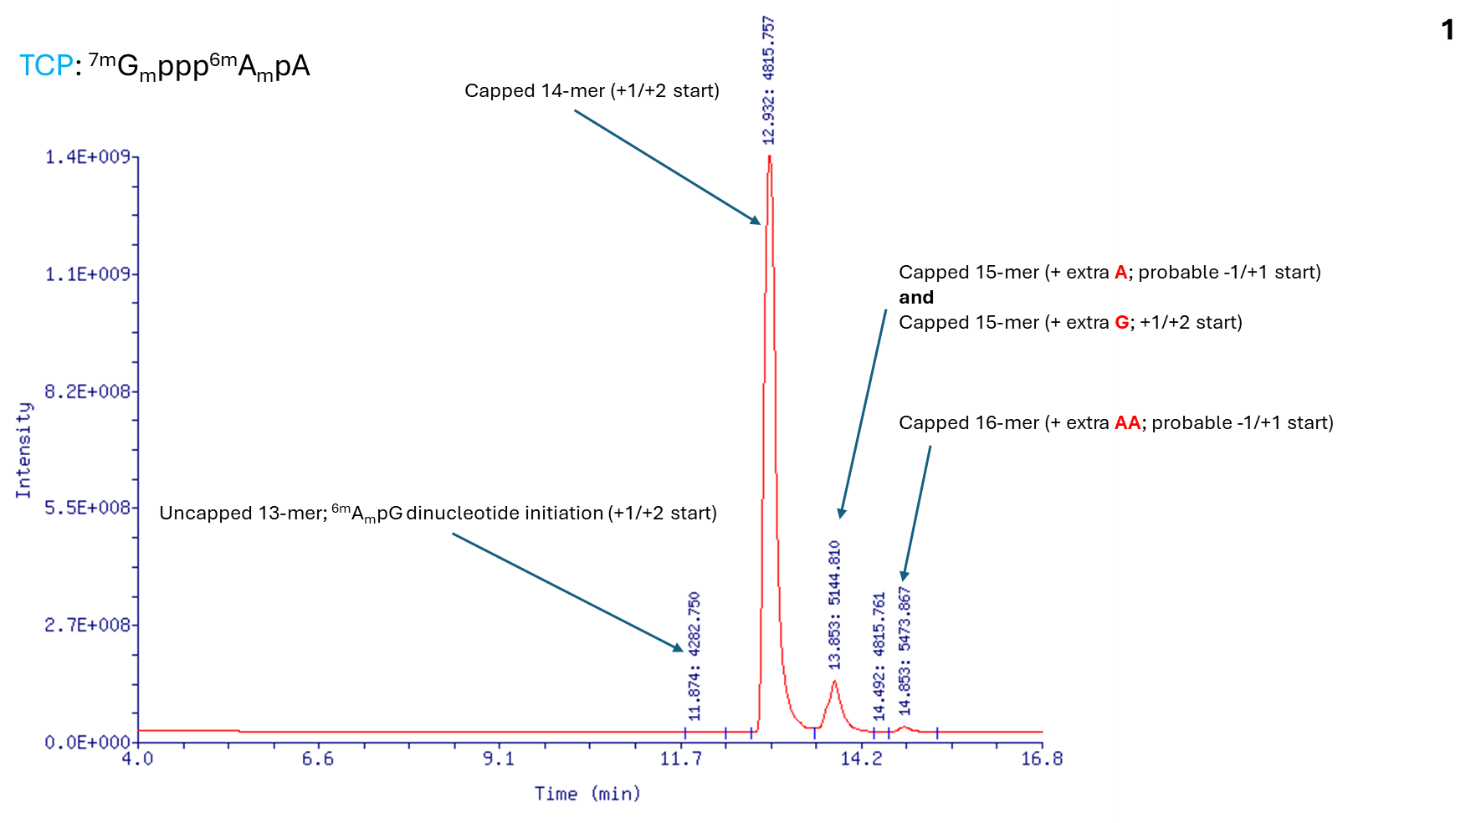


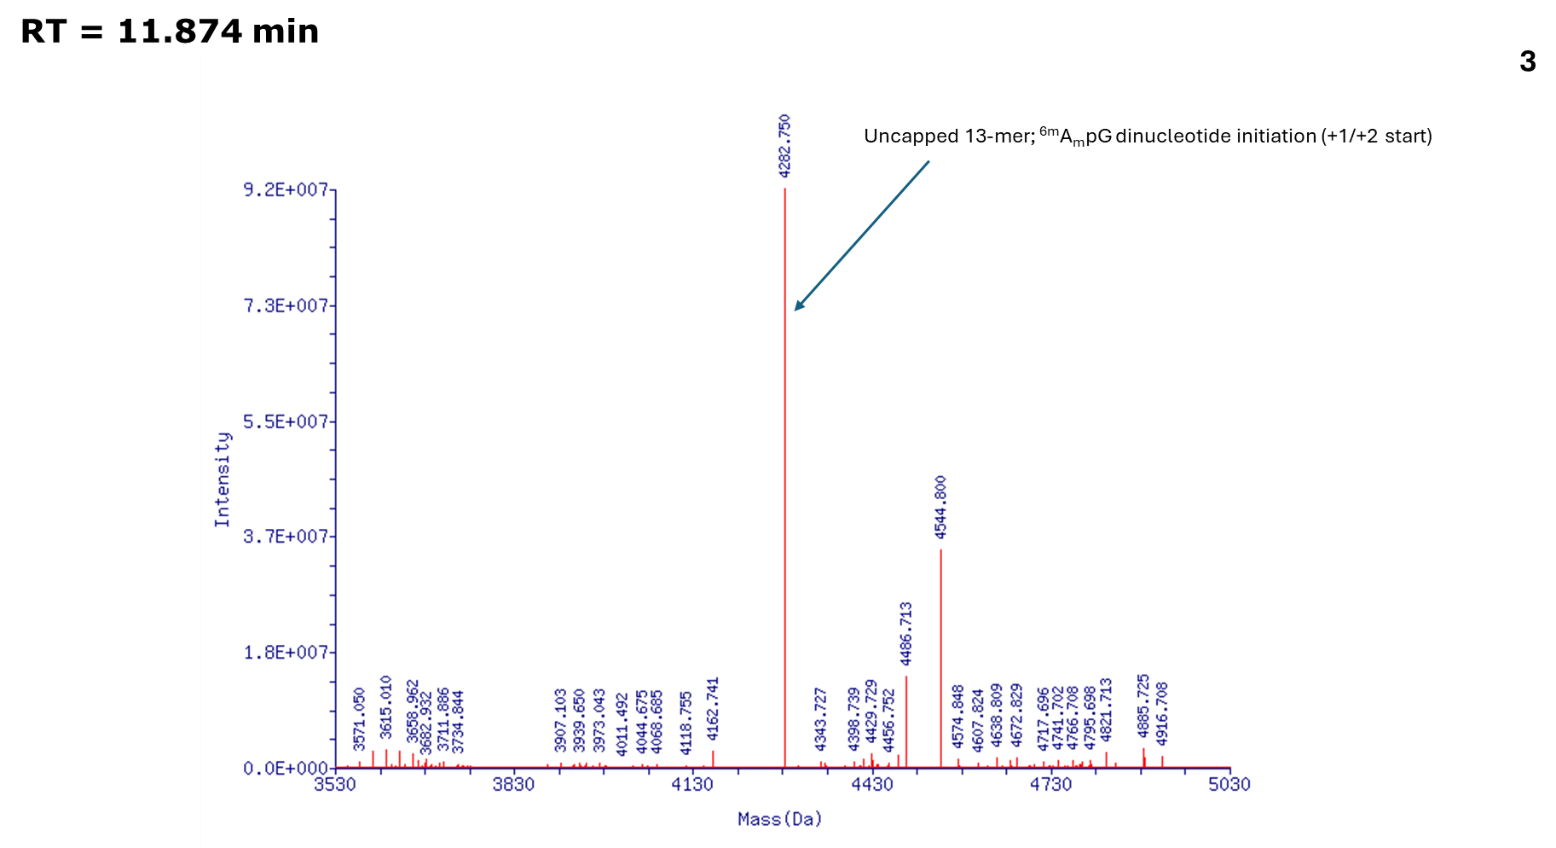


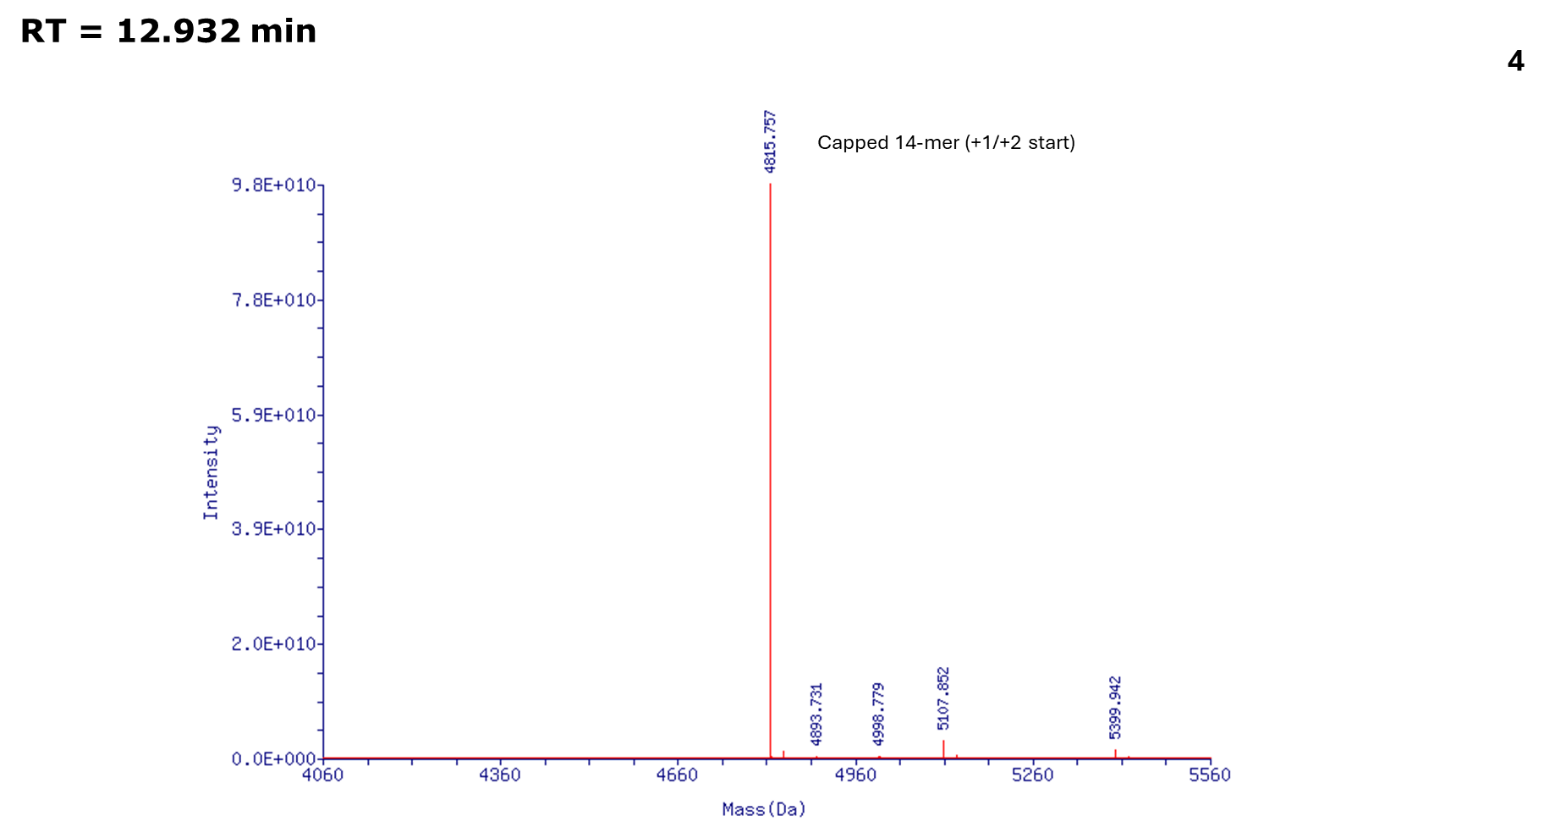


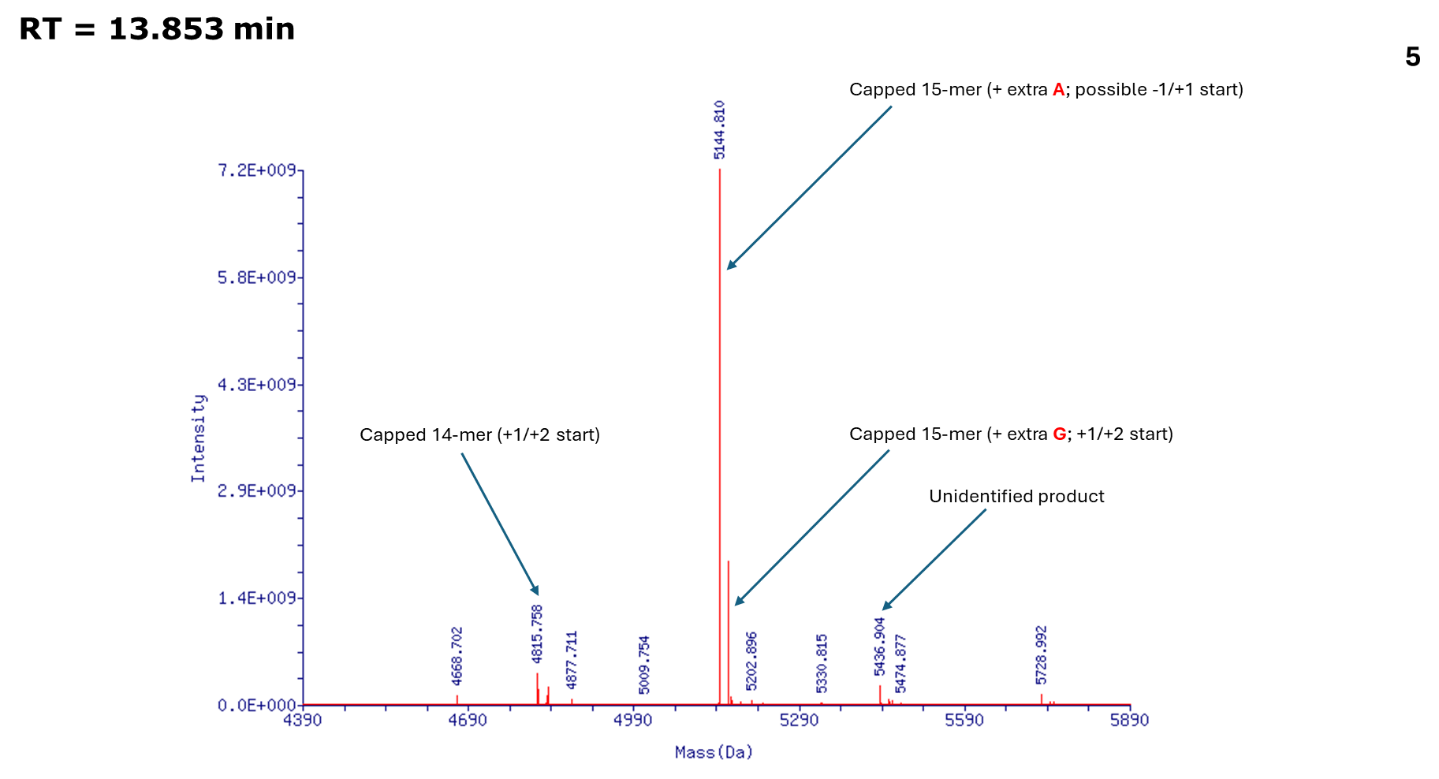


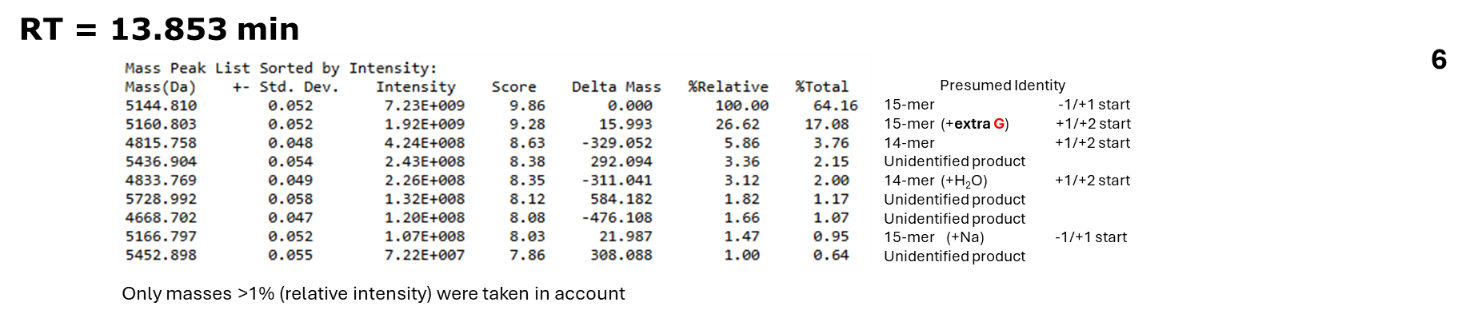


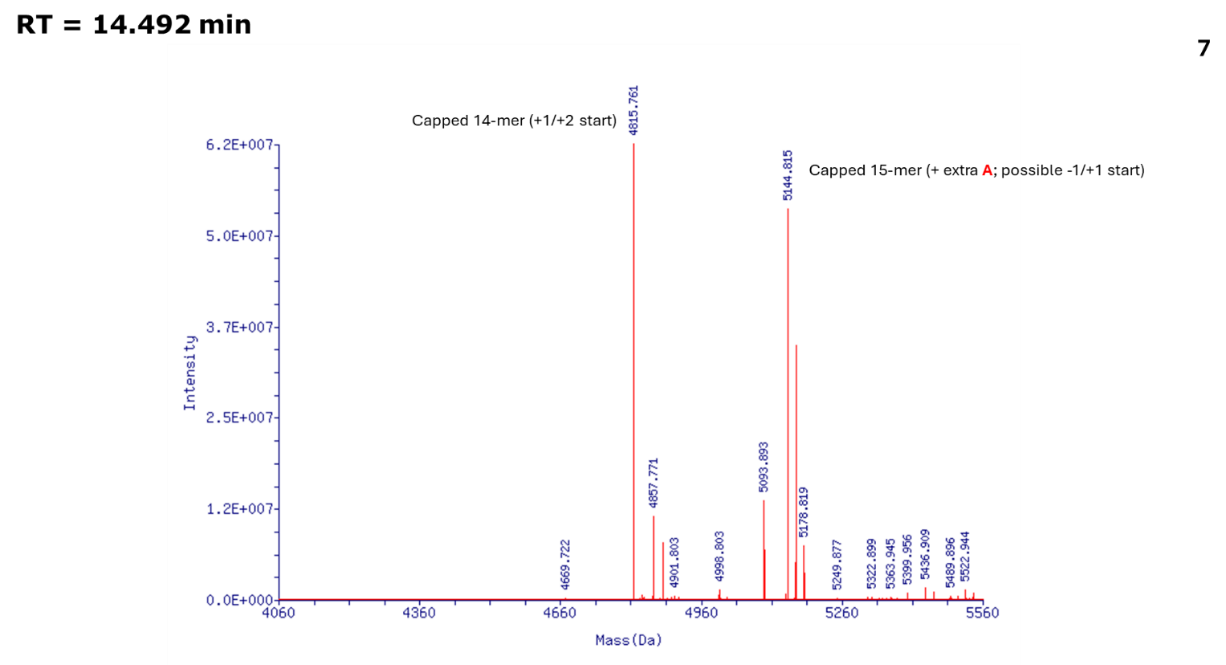


**
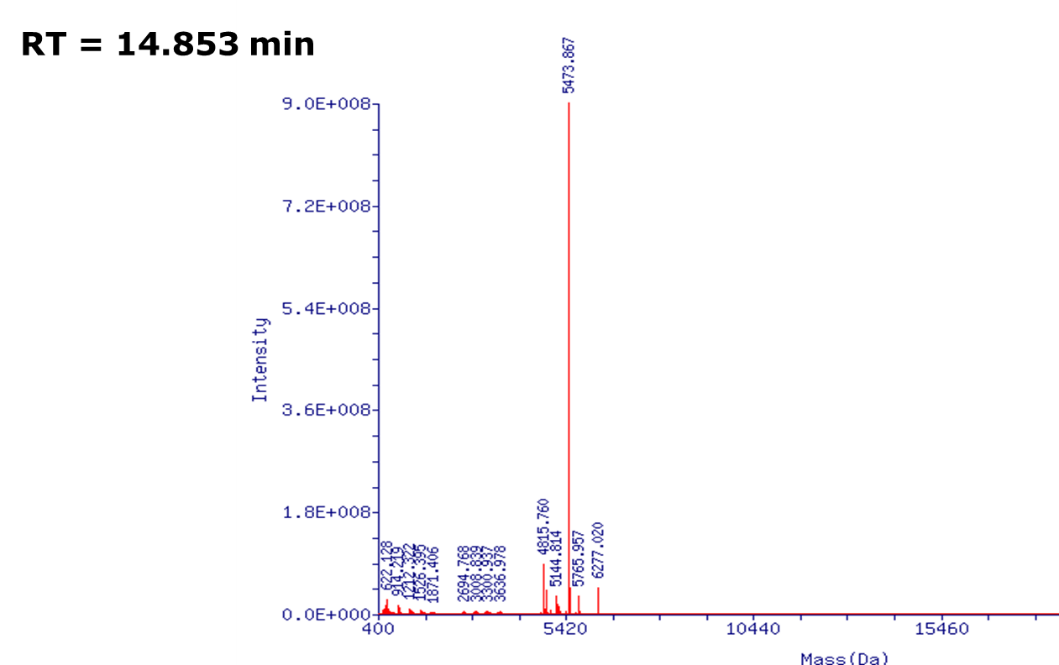
**

**
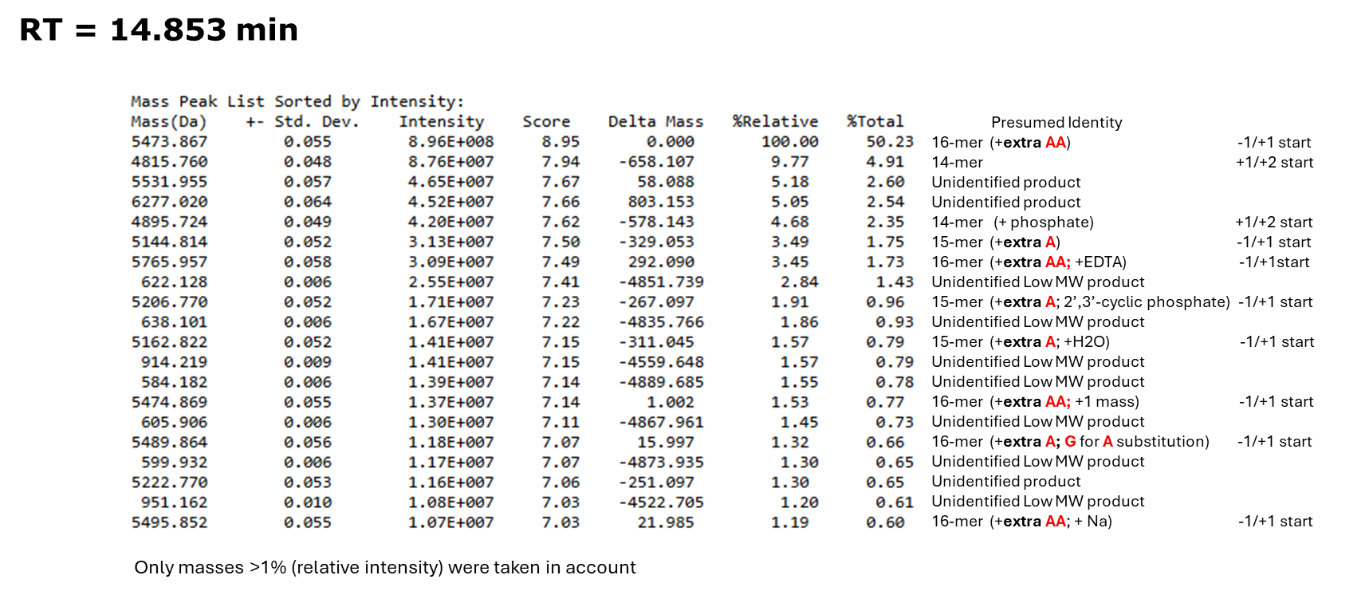
**

FIGURE S9B. Capping assay analytical data for TCP-mRNA synthesized on “d(TTCT)” DNA template using 7mGppp6mAmpA (1-1B) for IVT initiation (see Fig. 7). The appearance of capped 14-mer + H2O (4819.749) is a consequence of partial opening (hydrolysis) of imidazole ring of **7mG** base. The appearance of small amount of uncapped 13-mer (4282.742) is a result of TCP contamination with p6mAmpA which initiates at +1/+2 start position.

Calculated ratio of the products (+1/+2 start)/(-1/+1 start) = 7.7:1


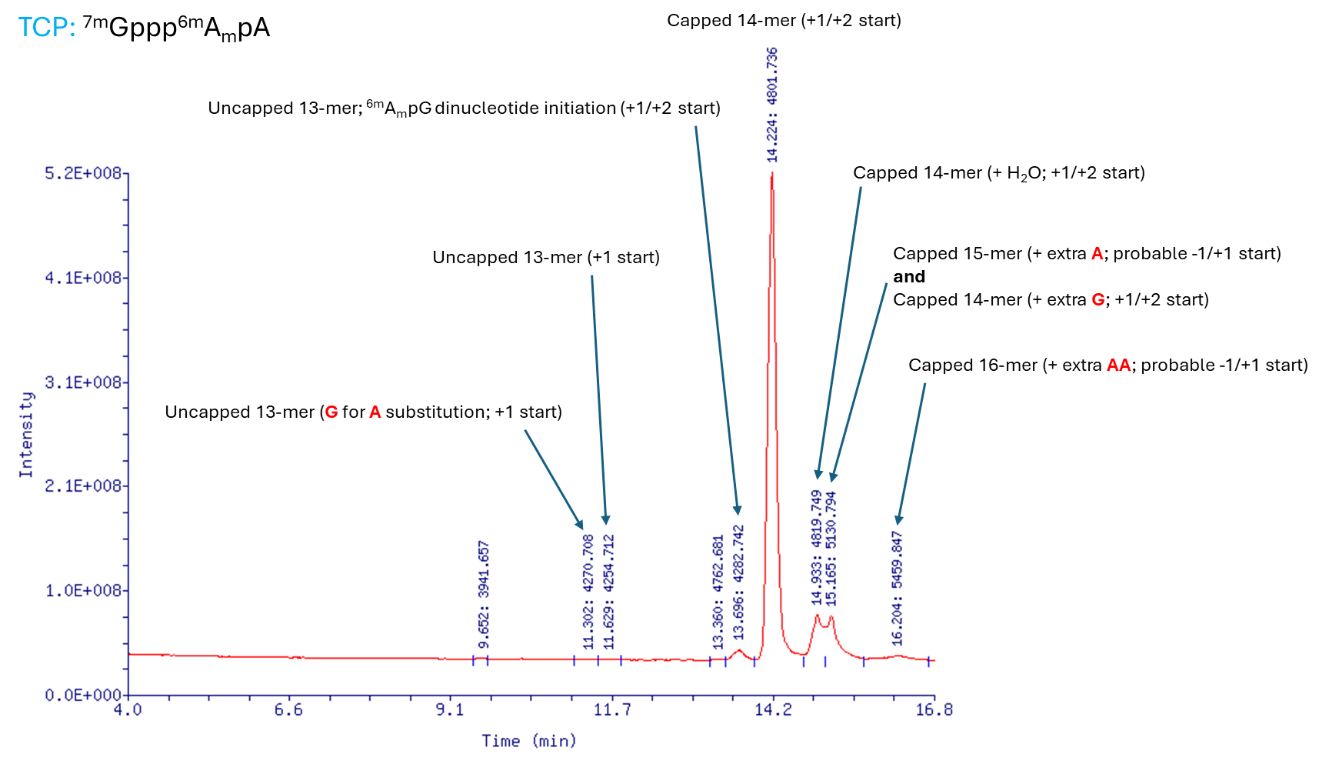


FIGURE S9C. Capping assay analytical data for TCP-mRNA synthesized on “d(TTCT)” DNA template using 7mGmpppAmpA (1-1B) for IVT initiation (see Fig. 7). The appearance of capped 14-mer + H2O (4819.703) is a consequence of partial opening (hydrolysis) of imidazole ring of **7mG** base. The appearance of small amount of uncapped 13-mer (4268.694) is a result of TCP contamination with pAmpA which initiates IVT at +1/+2 start position.

Calculated ratio of the products (+1/+2 start)/(-1/+1 start) = 4.7:1


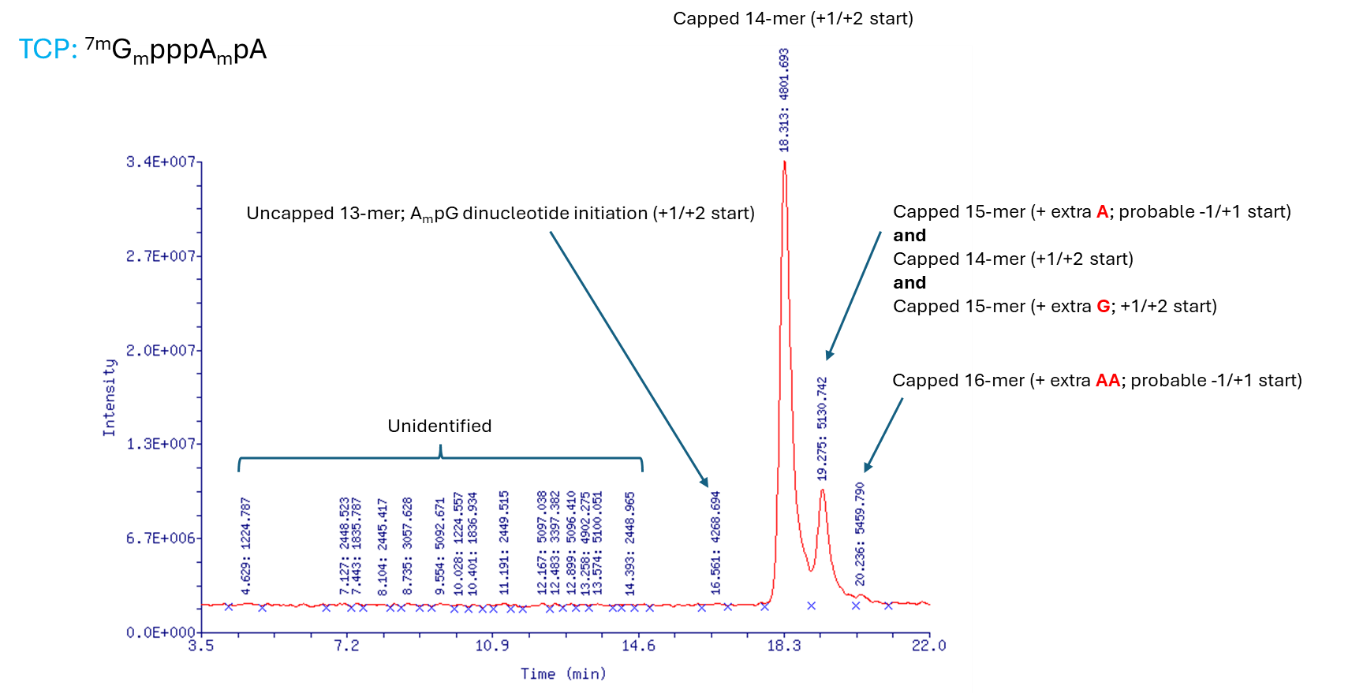


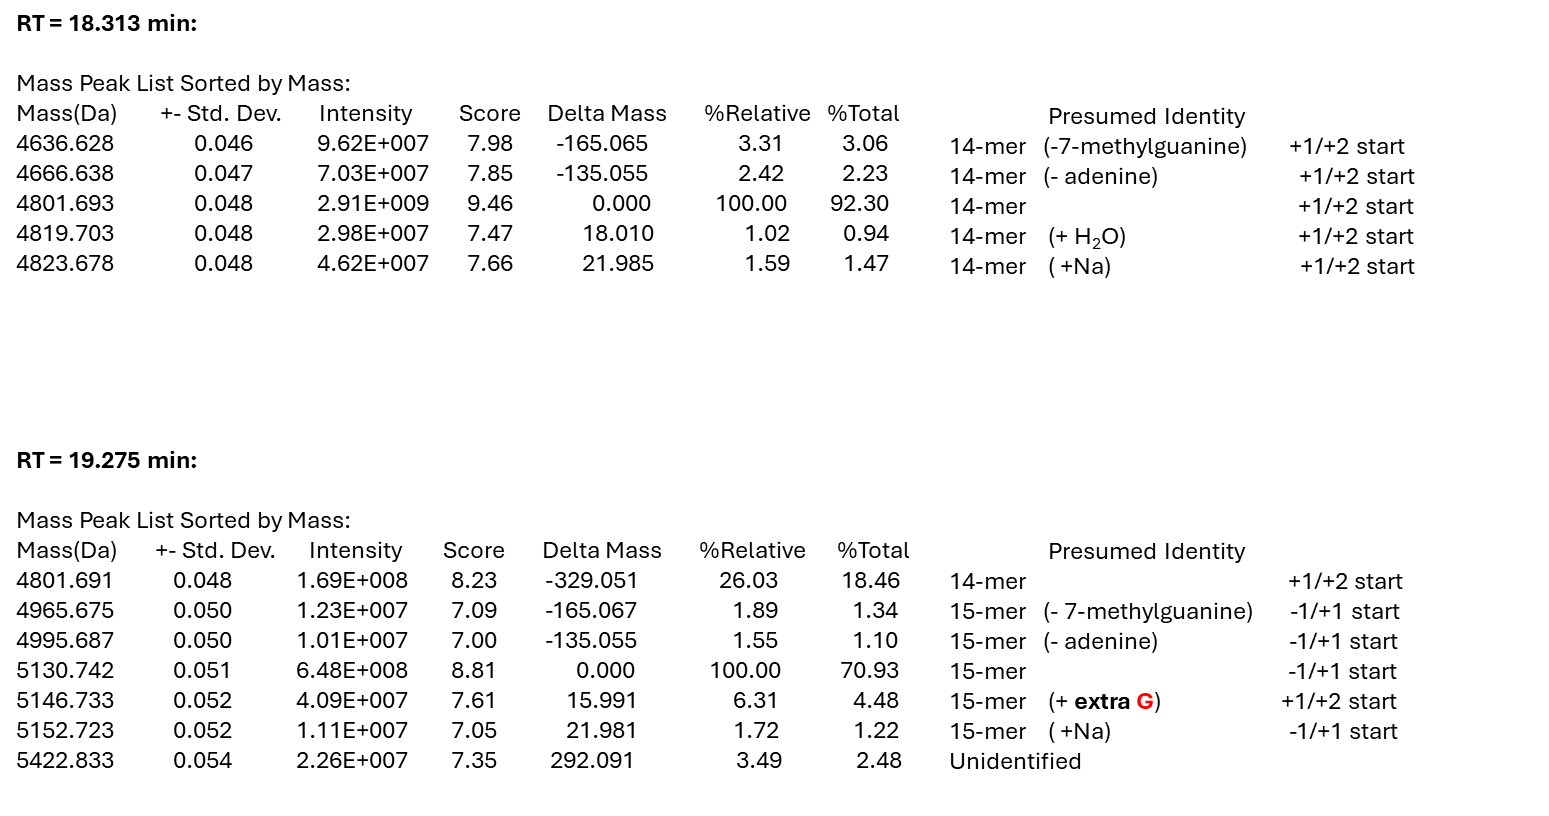


FIGURE S10 (A, B).Examples of capping assay analytical data for TCP-mRNAs synthesized on “d(TCCT)” DNA template using 7mGpppAmpG (1-1A) or 7mGmpppAmpG (1-2A) for IVT initiation.


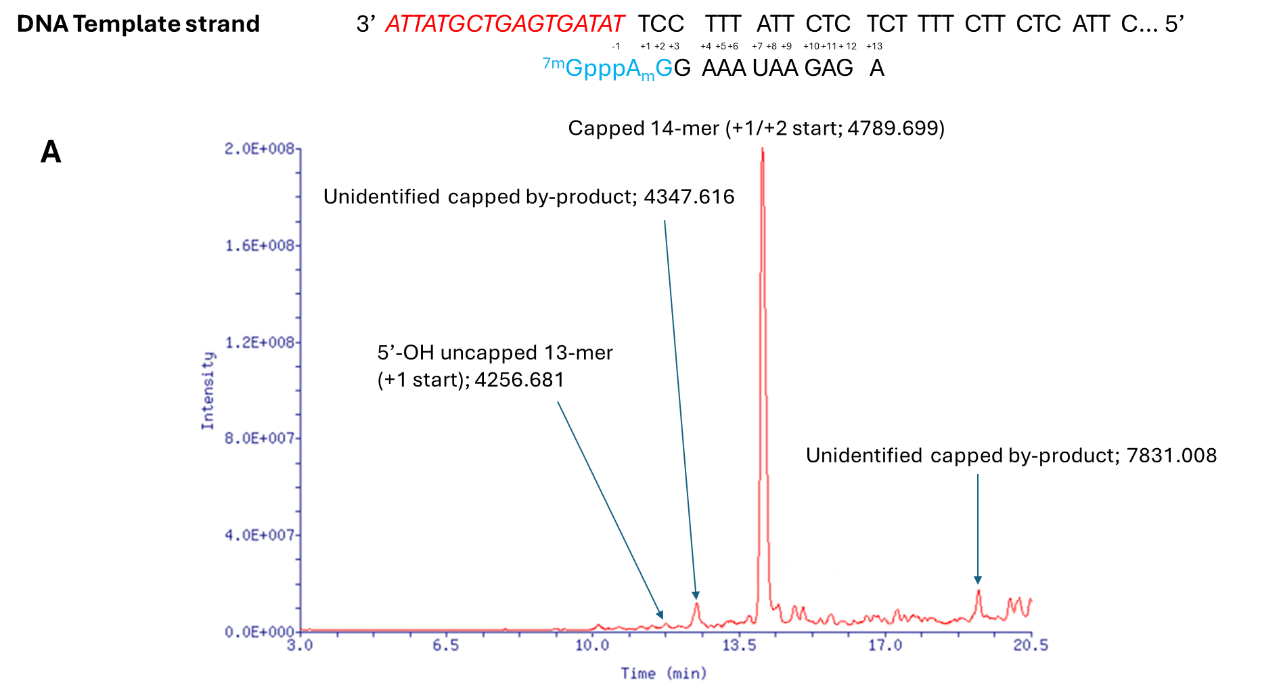


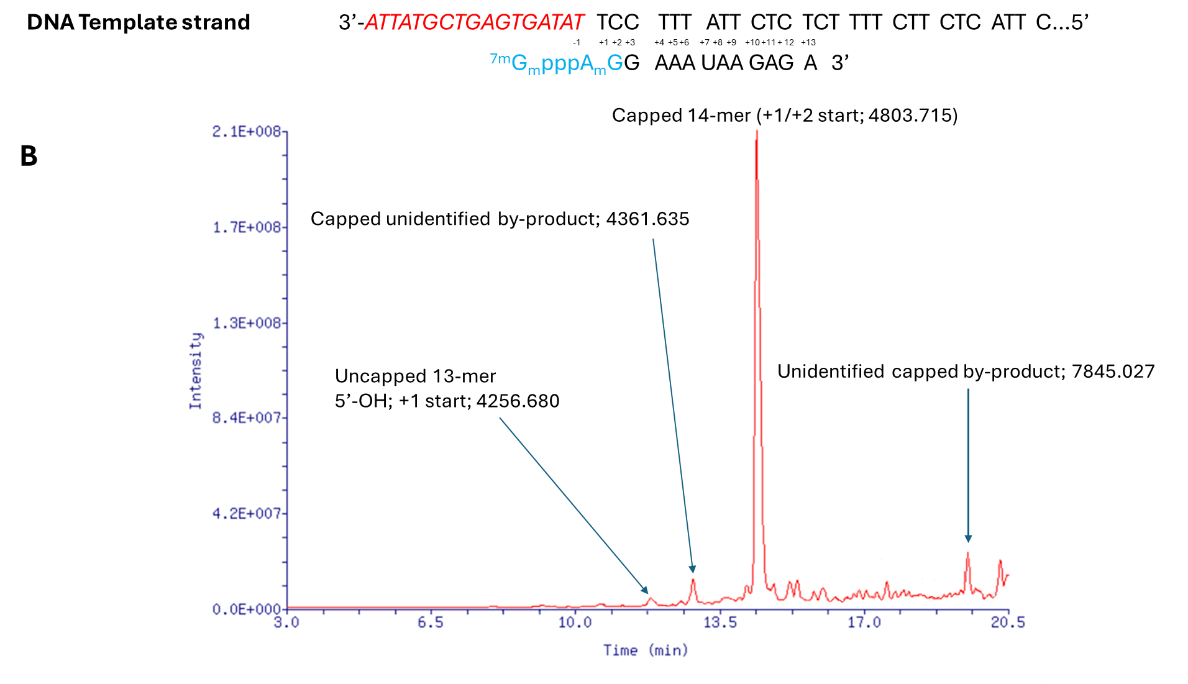


Study of competition between 7mGmpppAmpG and ppAmpG for initiation of TCP-RNA synthesis

IVT reaction was set up using conditions provided in product insert for CleanCap reagent N-7413 ([**https://www.trilinkbiotech.com/cleancap-reagent-ag-3-ome.html**](https://www.trilinkbiotech.com/cleancap-reagent-ag-3-ome.html));details are shown in the Tables below. A one-to-one (mol/mol) mixture of **7mGmpppAmpG** and **ppAmpG** in microtube containing all other components of IVT reaction was incubated at 37 °C for four different time points: 30 min, 1 hr, 2 hr, and 3 hr. Crude IVT mixtures were purified using Oligo-dT column and the capping assay was performed on the purified TCP-mRNA sample and analyzed by LC-MS.

**IVT synthesis of TCP-eGFP RNA: reaction conditions**

| **Reagent** | **Final Concentration** |
| --- | --- |
| Tris-HCl pH 7.5 | 40 mM |
| Magnesium Acetate | 16.5 mM |
| DTT | 10 mM |
| Spermidine | 2 mM |
| Triton X-100 | 0.002 % |
| ATP | 5 mM |
| CTP | 5 mM |
| GTP | 5 mM |
| 1mΨTP | 5 mM |
| 7mGmpppAmpG and ppAmpG | 4 mM (2 mM each) |
| eGFP DNA Template | 0.025 µg/µL |
| Rnase Inhibitor | 1 U/µL |
| Inorganic Pyrophosphatase | 0.002 U/µL |
| T7 RNA Polymerase | 8 U/µL |
| DI water | Up to 200 µL |

**RP-HPLC-MS capping assay results:** Ratio of ppAmpG-RNA to 7mGmpppAmpG-RNA

| IVT reaction, time point | Ratio,  ppAmpG-RNA : 7mGmpppAmpG-RNA |
| --- | --- |
| 0.5 hr | 11.2 |
| 1.0 hr | 9.9 |
| 2.0 hr | 9.6 |
| 3.0 hr | 9.7 |

Nucleotide Sequences of RNAs used in the work

FLuc mRNA:

5’

aggaaauaagagagaaaagaagaguaagaagaaauauaagagccaccauggaggacgccaagaacaucaagaagggccccgcccccuu cuacccccuggaggacggcaccgccggcgagcagcugcacaaggccaugaagcgguacgcccuggugcccggcaccaucgccuucaccgacgcccacaucgagguggacaucaccuacgccgaguacuucgagaugagcgugcggcuggccgaggccaugaagcgguacggccugaacaccaaccaccggaucguggugugcagcgagaacagccugcaguucuucaugcccgugcugggcgcccuguucaucggcguggccguggcccccgccaacgacaucuacaacgagcgggagcugcugaacagcaugggcaucagccagcccaccgugguguucgugagcaagaagggccugcagaagauccugaacgugcagaagaagcugcccaucauccagaagaucaucaucauggacagcaagaccgacuaccagggcuuccagagcauguacaccuucgugaccagccaccugccccccggcuucaacgaguacgacuucgugcccgagagcuucgaccgggacaagaccaucgcccugaucaugaacagcagcggcagcaccggccugcccaagggcguggcccugccccaccggaccgccugcgugcgguucagccacgcccgggaccccaucuucggcaaccagaucauccccgacaccgccauccugagcguggugcccuuccaccacggcuucggcauguucaccacccugggcuaccugaucugcggcuuccggguggugcugauguaccgguucgaggaggagcuguuccugcggagccugcaggacuacaagauccagagcgcccugcuggugcccacccuguucagcuucuucgccaagagcacccugaucgacaaguacgaccugagcaaccugcacgagaucgccagcggcggcgccccccugagcaaggaggugggcgaggccguggccaagcgguuccaccugcccggcauccggcagggcuacggccugaccgagaccaccagcgccauccugaucacccccgagggcgacgacaagcccggcgccgugggcaagguggugcccuucuucgaggccaaggugguggaccuggacaccggcaagacccugggcgugaaccagcggggcgagcugugcgugcggggccccaugaucaugagcggcuacgugaacaaccccgaggccaccaacgcccugaucgacaaggacggcuggcugcacagcggcgacaucgccuacugggacgaggacgagcacuucuucaucguggaccggcugaagagccugaucaaguacaagggcuaccagguggcccccgccgagcuggagagcauccugcugcagcaccccaacaucuucgacgccggcguggccggccugcccgacgacgacgccggcgagcugcccgccgccgugguggugcuggagcacggcaagaccaugaccgagaaggagaucguggacuacguggccagccaggugaccaccgccaagaagcugcggggcggcgugguguucguggacgaggugcccaagggccugaccggcaagcuggacgcccggaagauccgggagauccugaucaaggccaagaagggcggcaagaucgccgugugauuaauuaagcugccuucugcggggcuugccuucuggccaugcccuucuucucucccuugcaccuguaccucuuggucuuugaauaaagccugaguaggaagaaaaaaaaaaaaaaaaaaaaaaaaaaaaaaaaaaaaaaaaaaaaaaaaaaaaaaaaaaaaaaaaaaaaaaaaaaaaaaaaaaaaaaaaaaaaaaaaaaaaaaaaaaaaaaaaaaaaaaaa

eGFP-mRNA:

5’-aggaaauaagagagaaaagaagaguaagaagaaauauaagagccaccauggugagcaagggcgaggagcuguucaccgggguggugcccauc

cuggucgagcuggacggcgacguaaacggccacaaguucagcguguccggcgagggcgagggcgaugccaccuacggcaagcugacccugaaguucaucugcaccaccggcaagcugcccgugcccuggcccacccucgugaccacccugaccuacggcgugcagugcuucagccgcuaccccgaccacaugaagcagcacgacuucuucaaguccgccaugcccgaaggcuacguccaggagcgcaccaucuucuucaaggacgacggcaacuacaagacccgcgccgaggugaaguucgagggcgacacccuggugaaccgcaucgagcugaagggcaucgacuucaaggaggacggcaacauccuggggcacaagcuggaguacaacuacaacagccacaacgucuauaucauggccgacaagcagaagaacggcaucaaggugaacuucaagauccgccacaacaucgaggacggcagcgugcagcucgccgaccacuaccagcagaacacccccaucggcgacggccccgugcugcugcccgacaaccacuaccugagcacccaguccgcccugagcaaagaccccaacgagaagcgcgaucacaugguccugcuggaguucgugaccgccgccgggaucacucucggcauggacgagcuguacaaguaagcggccgcuuaauuaagcugccuucugcggggcuugccuucuggccaugcccuucuucucucccuugcaccuguaccucuuggucuuugaauaaagccugaguaggaagaaaaaaaaaaaaaaaaaaaaaaaaaaaaaaaaaaaaaaaaaaaaaaaaaaaaaaaaaaaaaaaaaaaaaaaaaaaaaaaaaaaaaaaaaaaaaaaaaaaaaaaaaaaaaaaaaaaaaaaa

dsRNA (top strand is shown):

5’-

aggaaauaagagagaaaagaagaguaagaagaaauauaagagccaccauggaggacgccaagaacaucaagaagggccccgcccccuucuacccccuggaggacggcaccgccggcgagcagcugcacaaggccaugaagcgguacgcccuggugcccggcaccaucgccuucaccgacgcccacaucgagguggacaucaccuacgccgaguacuucgagaugagcgugcggcuggccgaggccaugaagcgguacggccugaacaccaaccaccggaucguggugugcagcgagaacagccugcaguucuucaugcccgugcugggcgcccug

All dsDNA templates for IVT were generated by Trilink Biotechnologies using PCR amplification of respective plasmid DNA as a template.
